# Supplementary material for: DNA Methylation Modifications Associated with Chronic Fatigue Syndrome
Source: PLoS One. 2014 Aug 11;9(8):e104757. doi: 10.1371/journal.pone.0104757 (PMC4128721; doi:10.1371/journal.pone.0104757)
Supplement: Table S1 — Immunomodulatory medications and medications with known effects on epigenetic mechanisms used to exclude subjects from the study. (XLSX) [file pone.0104757.s001.xlsx]

## Sheet: Table S1
Table S1. Immunomodulatory medications and medications with known effects on epigenetic mechanisms used to exclude subjects from the study.
Drug	Drug activity
6-mercaptopurine	Immunosuppressant
6-thioguanine	Immunosuppressant
Aldosterone	Immunosuppressant
Amitriptyline	Hypomethylation
Azacitidine	Immunosuppressant
Betamethasone	Immunosuppressant
Carbamazepine	Hypomethylation
Cortisone acetate	Immunosuppressant
Decitabine	Immunosuppressant
Deoxycorticosterone acetate (DOCA)	Immunosuppressant
Dexamethasone	Immunosuppressant
Fludrocortisone acetate	Immunosuppressant
Hydrocortisone/cortisol	Immunosuppressant
Methotrexate	Immunosuppressant
Phenytoin	Hypomethylation
Prednisolone	Immunosuppressant
Prednisone	Immunosuppressant
Valproic acid	Hypomethylation
