# Supplementary material for: DNA Methylation Modifications Associated with Chronic Fatigue Syndrome
Source: PLoS One. 2014 Aug 11;9(8):e104757. doi: 10.1371/journal.pone.0104757 (PMC4128721; doi:10.1371/journal.pone.0104757)
Supplement: Table S2 — CpG sites identified as differentially methylated in CFS patients compared to healthy controls. (XLSX) [file pone.0104757.s002.xlsx]

## Sheet: Table S2
Table S2. CpG sites identified as differentially methylated in CFS patients compared to healthy controls.
Probe name	Gene Name	Gene Accession Number	P-Value	Adjust Pval	Beta-Difference	Mean_CFS	Mean_Control
cg07814932	ADAM30	NM_021794	0.00143261	0.0426547	0.229545	0.830302	0.600758
cg09453312	ITK	NM_005546	0.00111458	0.0426547	-0.255604	0.485817	0.741421
cg00030432	MEPCE	NM_019606	0.00143261	0.0426547	0.224487	0.740287	0.515799
cg15593510	OR10T2	NM_001004475	0.00143261	0.0426547	-0.201534	0.54536	0.746894
cg17496921	TSPAN16	NM_012466	0.00363662	0.045968	0.232289	0.703989	0.4717
cg07728874	CD3D;CD3D	NM_001040651;NM_000732	0.00363662	0.045968	-0.203485	0.470396	0.67388
cg06958535	LAX1;LAX1;LAX1	NM_017773;NM_001136190;NM_017773	0.00291403	0.0442236	-0.23981	0.401331	0.641141
cg13300301	FUT4;FUT4	NM_002033;NM_002033	0.00231643	0.0430677	0.244872	0.698958	0.454085
cg22805603	NLRC4;NLRC4	NM_021209;NM_021209	0.00291403	0.0442236	0.21572	0.775236	0.559516
cg18313182	PNPLA2;PNPLA2	NM_020376;NM_020376	0.00231643	0.0430677	0.227238	0.723147	0.495909
cg04399899	RAPGEF2;RAPGEF2	NM_014247;NM_014247	0.00363662	0.045968	0.217144	0.663984	0.44684
cg25382751	TSPAN16;TSPAN16	NM_012466;NM_012466	0.00182978	0.0426547	0.20165	0.792092	0.590441
cg12124912	VSIG4;VSIG4;VSIG4;VSIG4	NM_001100431;NM_001100431;NM_007268;NM_007268	0.00291403	0.0442236	0.212459	0.666844	0.454385
cg25734726	SERTAD3;SERTAD3;SERTAD3	NM_013368;NM_203344;NM_013368	0.00363662	0.045968	0.232111	0.762729	0.530619
cg07708453	PRDM2;PRDM2;PRDM2;PRDM2;PRDM2	NM_012231;NM_015866;NM_012231;NM_001135610;NM_015866	0.00143261	0.0426547	0.20403	0.624531	0.420501
cg04784315	GPR21;RABGAP1	NM_005294;NM_012197	0.00231643	0.0430677	0.217443	0.735124	0.517681
cg02212836	LY86;LOC285780	NM_004271;NR_026970	0.00111458	0.0426547	-0.220573	0.408564	0.629136
cg11630392	GPR171;MED12L;GPR171	NM_013308;NM_053002;NM_013308	0.00363662	0.045968	-0.237435	0.311799	0.549234
cg06513247	SEPT9;SEPT9;SEPT9;SEPT9;SEPT9;SEPT9;SEPT9	NM_001113496;NM_001113492;NM_001113496;NM_001113493;NM_001113491;NM_006640;NM_001113494	0.00231643	0.0430677	-0.222943	0.348694	0.571636
cg05000446	C9orf131;C9orf131;C9orf131;C9orf131	NM_203299;NM_001040411;NM_001040410;NM_001040412	0.00451305	0.048697	0.253676	0.744308	0.490631
cg15361231	GLRX2;GLRX2;GLRX2	NM_016066;NM_197962;NM_016066	0.00451305	0.048697	0.249071	0.781578	0.532506
cg07573020	ANKH	NM_054027	0.00363662	0.045968	-0.23817	0.466201	0.704371
cg06352352	C16orf70	NM_025187	0.00182978	0.0426547	0.271244	0.771522	0.500279
cg23302989	C7orf31	NM_138811	0.00231643	0.0430677	0.247623	0.812874	0.565251
cg05071334	CA13	NM_198584	0.00363662	0.045968	0.212839	0.764227	0.551388
cg10323962	CA5A	NM_001739	0.00291403	0.0442236	0.239304	0.694305	0.455
cg01627252	CAPN14	NM_001145122	0.00182978	0.0426547	0.24619	0.762864	0.516674
cg21700214	CNDP1	NM_032649	0.00363662	0.045968	0.263314	0.737789	0.474475
cg20242427	DAK	NM_015533	0.00231643	0.0430677	0.247613	0.746096	0.498483
cg19055828	DIP2B	NM_173602	0.00291403	0.0442236	0.264585	0.804381	0.539796
cg10456459	ETNK1	NM_018638	0.00363662	0.045968	0.23531	0.796587	0.561277
cg04452195	GJB2	NM_004004	0.00182978	0.0426547	0.234357	0.758181	0.523824
cg13036546	HLA-E	NM_005516	0.000274392	0.0426547	-0.223706	0.483589	0.707295
cg19109457	HLA-E	NM_005516	0.000656027	0.0426547	-0.216265	0.369674	0.585939
cg03038262	IFITM1	NM_003641	0.00231643	0.0430677	-0.211867	0.359996	0.571863
cg17953136	LAPTM4A	NM_014713	0.000656027	0.0426547	0.241497	0.818799	0.577302
cg16283183	LIMD1	NM_014240	0.00231643	0.0430677	0.212149	0.655508	0.443359
cg09694051	MED21	NM_004264	0.00363662	0.045968	0.247889	0.824588	0.576699
cg00682263	MEGF11	NM_032445	0.00451305	0.048697	0.236234	0.697878	0.461645
cg14696926	MYOM2	NM_003970	0.00231643	0.0430677	-0.255899	0.467293	0.723192
cg17301248	NAA25	NM_024953	0.00291403	0.0442236	0.23527	0.725014	0.489744
cg20925233	NXPH3	NM_007225	0.00231643	0.0430677	0.269527	0.703843	0.434317
cg04488111	PMVK	NM_006556	0.00291403	0.0442236	0.228593	0.761044	0.532451
cg01519464	RCAN3	NM_013441	0.00111458	0.0426547	-0.234932	0.499933	0.734865
cg25140783	RCAN3	NM_013441	0.00363662	0.045968	-0.237501	0.348765	0.586266
cg26692749	RCAN3	NM_013441	0.00143261	0.0426547	-0.269976	0.391738	0.661715
cg01766396	RFTN2	NM_144629	0.00231643	0.0430677	0.275006	0.746299	0.471293
cg18812353	RFX7	NM_022841	0.00363662	0.045968	0.223228	0.8576	0.634372
cg06655349	S1PR2	NM_004230	0.00451305	0.048697	0.226791	0.727815	0.501024
cg00905101	SEPX1	NM_016332	0.00111458	0.0426547	0.200123	0.605355	0.405232
cg26130864	SLC4A11	NM_032034	0.00143261	0.0426547	0.200937	0.770365	0.569428
cg01502428	TIMP2	NM_003255	0.00231643	0.0430677	0.220351	0.786247	0.565895
cg15010903	TIMP2	NM_003255	0.00363662	0.045968	0.239619	0.812193	0.572573
cg12483340	TMEM87A	NM_015497	0.00231643	0.0430677	0.265323	0.817682	0.552359
cg00255699	TRIT1	NM_017646	0.00231643	0.0430677	-0.233559	0.452379	0.685938
cg16265859	UBR4	NM_020765	0.00291403	0.0442236	-0.239821	0.405699	0.64552
cg16102040	ZNF827	NM_178835	0.00363662	0.045968	0.212094	0.833376	0.621282
cg21536783	TACSTD2;TACSTD2	NM_002353;NM_002353	0.00291403	0.0442236	0.201828	0.715507	0.513679
cg07481273	C14orf109;C14orf109	NM_001098621;NM_015676	0.00182978	0.0426547	0.216814	0.718555	0.501741
cg13203135	C21orf33;C21orf33	NM_004649;NM_198155	0.00143261	0.0426547	-0.235317	0.197652	0.432969
cg25025545	CD83;CD83	NM_004233;NM_001040280	0.00363662	0.045968	0.238156	0.758274	0.520119
cg11231701	CDK5RAP1;CDK5RAP1	NM_016082;NM_016408	0.000857939	0.0426547	0.231398	0.737888	0.506491
cg21002528	CRY2;CRY2	NM_021117;NM_001127457	0.00231643	0.0430677	0.250828	0.742335	0.491507
cg21149266	FAM63B;FAM63B	NM_001040450;NM_001040453	0.00363662	0.045968	0.236947	0.586212	0.349265
cg24743301	FBLN7;FBLN7	NM_001128165;NM_153214	0.00291403	0.0442236	-0.223721	0.443034	0.666755
cg27123392	GABPB1;GABPB1	NM_016654;NM_005254	0.00143261	0.0426547	0.240195	0.80403	0.563835
cg16481332	IQCE;IQCE	NM_152558;NM_001100390	0.00182978	0.0426547	0.244518	0.720988	0.47647
cg01170124	ISCU;ISCU	NM_213595;NM_014301	0.00231643	0.0430677	-0.29804	0.427355	0.725395
cg19935471	MATN2;MATN2	NM_030583;NM_002380	0.00143261	0.0426547	0.2245	0.808347	0.583847
cg26118326	MCL1;MCL1	NM_182763;NM_021960	0.000656027	0.0426547	-0.27934	0.421446	0.700786
cg15183258	MGA;MGA	NM_001080541;NM_001164273	0.000495534	0.0426547	0.251606	0.795619	0.544014
cg14728071	MLLT10;MLLT10	NM_001009569;NM_004641	0.00111458	0.0426547	-0.243581	0.485888	0.729469
cg05486872	MYOM1;MYOM1	NM_019856;NM_003803	0.000857939	0.0426547	0.264513	0.690338	0.425826
cg07033722	PPT1;PPT1	NM_001142604;NM_000310	0.00231643	0.0430677	0.247599	0.773441	0.525842
cg08109681	RPS6KA2;RPS6KA2	NM_001006932;NM_021135	0.00182978	0.0426547	-0.230976	0.496695	0.727671
cg19157819	SYNPO2L;SYNPO2L	NM_001114133;NM_024875	0.00291403	0.0442236	0.264875	0.695039	0.430164
cg07772516	TMOD2;TMOD2	NM_014548;NM_001142885	0.00111458	0.0426547	0.251266	0.683657	0.432391
cg06135285	ULK2;ULK2	NM_014683;NM_001142610	0.00111458	0.0426547	-0.207308	0.533045	0.740353
cg09273112	VPS24;VPS24	NM_001005753;NM_016079	0.000857939	0.0426547	0.241847	0.856424	0.614577
cg12122241	SIRPA;SIRPA;SIRPA	NM_080792;NM_001040023;NM_001040022	0.00291403	0.0442236	0.205266	0.736654	0.531388
cg04304036	SLC7A6;SLC7A6;SLC7A6OS	NM_001076785;NM_003983;NM_032178	0.000857939	0.0426547	0.25982	0.694214	0.434394
cg11849798	ZNF706;ZNF706;ZNF706	NM_001042510;NM_001042511;NM_016096	0.00451305	0.048697	0.21454	0.720542	0.506002
cg11147155	ENSA;ENSA;ENSA;ENSA	NM_207045;NM_207042;NM_004436;NM_207046	0.00182978	0.0426547	0.219392	0.630452	0.41106
cg26633373	MYADM;MYADM;MYADM;MYADM;MYADM	NM_001020821;NM_001020820;NM_001020819;NM_001020818;NM_138373	0.00182978	0.0426547	0.201315	0.679103	0.477789
cg00668519	VGLL4;ATG7;VGLL4;ATG7;VGLL4;ATG7;VGLL4	NM_014667;NM_001144912;NM_001128220;NM_001136031;NM_001128219;NM_006395;NM_001128221	0.000857939	0.0426547	0.252463	0.660522	0.408059
cg18517540	DTNA;DTNA;DTNA;DTNA;DTNA;DTNA;DTNA	NM_001391;NM_032978;NM_032975;NM_001390;NM_032980;NM_032979;NM_032981	0.00291403	0.0442236	-0.227181	0.445793	0.672974
cg16374333	ETV3;ETV3	NM_005240;NM_001145312	0.00182978	0.0426547	-0.239886	0.511763	0.751649
cg03370752	TMEM138;TMEM138	NM_016464;NR_028473	0.000857939	0.0426547	0.24517	0.834759	0.589589
cg22396850	AARSD1;AARSD1;AARSD1;AARSD1	NM_001142653;NM_025267;NM_001142654;NM_001136042	0.00143261	0.0426547	0.230287	0.628443	0.398156
cg07356342	NDUFS2;NDUFS2;FCER1G	NM_001166159;NM_004550;NM_004106	0.00291403	0.0442236	0.229493	0.758763	0.52927
cg02226192	ANKRD11	NM_013275	0.00354263	0.045968	0.210475	0.726823	0.516348
cg27660627	ANKRD11	NM_013275	0.00182978	0.0426547	0.204872	0.778155	0.573282
cg18084554	ARID3A	NM_005224	0.00363662	0.045968	0.204874	0.661939	0.457064
cg16051954	CABC1	NM_020247	0.00111458	0.0426547	0.243362	0.781089	0.537727
cg24501381	CCDC30	NM_001080850	0.00182978	0.0426547	0.247106	0.822564	0.575458
cg24612198	CD3E	NM_000733	0.00363662	0.045968	-0.201664	0.605024	0.806689
cg05575639	CHD7	NM_017780	0.000495534	0.0426547	0.208324	0.764196	0.555873
cg24131359	CPM	NM_001874	0.00451305	0.048697	0.201288	0.862118	0.66083
cg26709988	CRISPLD2	NM_031476	0.00451305	0.048697	0.200145	0.754811	0.554667
cg16844053	CUL1	NM_003592	0.00231643	0.0430677	0.213957	0.798901	0.584944
cg08539965	EIF4G3	NM_003760	0.00143261	0.0426547	0.281408	0.770029	0.48862
cg26561681	EIF4G3	NM_003760	0.000495534	0.0426547	0.243203	0.702555	0.459352
cg09324018	FAM49A	NM_030797	0.00231643	0.0430677	0.204581	0.64348	0.438899
cg07212327	FAM49B	NM_016623	0.000857939	0.0426547	0.221971	0.855845	0.633874
cg04516672	FAM53B	NM_014661	0.00451305	0.048697	-0.235115	0.374071	0.609187
cg17815933	FOXJ2	NM_018416	0.000495534	0.0426547	-0.207466	0.258984	0.46645
cg06719445	FOXN3	NM_001085471	0.00363662	0.045968	0.224897	0.757221	0.532324
cg17587997	FYN	NM_002037	0.00363662	0.045968	-0.297656	0.414714	0.71237
cg00323915	GIMAP4	NM_018326	0.00451305	0.048697	-0.244067	0.435184	0.679251
cg03334072	GIMAP5	NM_018384	0.000495534	0.0426547	-0.251908	0.392557	0.644464
cg03800150	GIMAP7	NM_153236	0.000495534	0.0426547	-0.243767	0.531033	0.7748
cg09132388	GIMAP7	NM_153236	0.00291403	0.0442236	-0.213144	0.575224	0.788369
cg16532400	GIMAP7	NM_153236	0.00291403	0.0442236	-0.221992	0.552779	0.774771
cg14665366	GPRIN3	NM_198281	0.00182978	0.0426547	-0.244894	0.489066	0.73396
cg15172061	GSDMD	NM_001166237	0.00143261	0.0426547	0.20766	0.825223	0.617563
cg14703454	HHLA2	NM_007072	0.00291403	0.0442236	0.237449	0.769499	0.53205
cg02175033	KIAA0247	NM_014734	0.00231643	0.0430677	0.230339	0.667838	0.437499
cg27260684	KIAA0513	NM_014732	0.00451305	0.048697	0.212802	0.758044	0.545242
cg01837846	KLHL29	NM_052920	0.00363662	0.045968	-0.205675	0.366157	0.571831
cg03926751	KLHL8	NM_020803	0.00231643	0.0430677	0.21995	0.639994	0.420044
cg17078393	LCK	NM_005356	0.00451305	0.048697	-0.209346	0.551977	0.761323
cg04590170	LMO2	NM_005574	0.00363662	0.045968	0.206665	0.692957	0.486292
cg19499884	LZTS2	NM_032429	0.00231643	0.0430677	0.208528	0.645359	0.436831
cg07495389	MAPRE3	NM_012326	0.00291403	0.0442236	0.210391	0.721229	0.510838
cg24938761	MOBKL2A	NM_130807	0.00451305	0.048697	0.205501	0.69332	0.487819
cg22675447	NIPAL3	NM_020448	0.00231643	0.0430677	0.202224	0.567787	0.365563
cg02041484	NRF1	NM_005011	0.00291403	0.0442236	0.220551	0.6905	0.469949
cg23828876	PCYT1A	NM_005017	0.00363662	0.045968	-0.263244	0.469053	0.732298
cg10487428	PDE4D	NM_001165899	0.00231643	0.0430677	0.224764	0.80208	0.577316
cg05132828	PITPNM2	NM_020845	0.00363662	0.045968	-0.218315	0.355726	0.574041
cg26818464	PRKCQ	NM_006257	0.000495534	0.0426547	-0.209024	0.471966	0.68099
cg07053114	PTPRE	NM_006504	0.00291403	0.0442236	0.213737	0.645041	0.431305
cg08110693	PXT1	NM_152990	0.000857939	0.0426547	0.251596	0.824387	0.572791
cg20021790	RPH3AL	NM_006987	0.00182978	0.0426547	-0.227547	0.380316	0.607862
cg23956760	SLC25A42	NM_178526	0.00451305	0.048697	0.211818	0.716735	0.504917
cg27391816	SLC35E2	NM_182838	0.00182978	0.0426547	0.229953	0.74732	0.517367
cg24011341	SOX5	NM_152989	0.00451305	0.048697	-0.224929	0.517677	0.742606
cg07929956	ST3GAL2	NM_006927	0.00451305	0.048697	-0.220764	0.444488	0.665252
cg17627898	TAOK3	NM_016281	0.00291403	0.0442236	0.216709	0.651157	0.434448
cg23184226	TECPR1	NM_015395	0.000857939	0.0426547	-0.232449	0.441335	0.673784
cg08863939	TLK1	NM_001136554	0.00143261	0.0426547	-0.200783	0.324956	0.52574
cg24215459	TNIP3	NM_001128843	0.00363662	0.045968	-0.242174	0.460379	0.702553
cg17313269	TRIM38	NM_006355	0.00451305	0.048697	0.247554	0.782353	0.534799
cg24012880	TSPAN18	NM_130783	0.00291403	0.0442236	0.253714	0.728422	0.474709
cg13178361	UAP1	NM_003115	0.00182978	0.0426547	0.270834	0.807811	0.536977
cg25429672	UCP2	NM_003355	0.00363662	0.045968	-0.238143	0.435243	0.673386
cg02309841	VGLL4	NM_014667	0.00111458	0.0426547	0.23589	0.734552	0.498661
cg13640297	WDR27	NM_182552	0.00231643	0.0430677	0.206201	0.827052	0.620851
cg26313511	ZNF148	NM_021964	0.00363662	0.045968	0.226604	0.719844	0.49324
cg21253742	ZNF592	NM_014630	0.00291403	0.0442236	-0.241506	0.47612	0.717626
cg15880738	CD3G;CD3G	NM_000073;NM_000073	0.00451305	0.048697	-0.214459	0.485169	0.699628
cg18463686	CLEC5A;CLEC5A	NM_013252;NM_013252	0.00182978	0.0426547	0.227705	0.731519	0.503814
cg16000989	DCAF4L1;DCAF4L1	NM_001029955;NM_001029955	0.00182978	0.0426547	0.229671	0.787669	0.557999
cg15344028	ICOS;ICOS	NM_012092;NM_012092	0.00451305	0.048697	-0.209666	0.457156	0.666822
cg05350315	LCK;LCK	NM_005356;NM_005356	0.00451305	0.048697	-0.203617	0.304849	0.508466
cg17205313	TTC39C;TTC39C	NM_153211;NM_153211	0.00291403	0.0442236	-0.233938	0.464551	0.698488
cg16068833	UBXN11;CD52	NM_145345;NM_001803	0.000656027	0.0426547	-0.214922	0.176577	0.391498
cg26701826	SGMS2;SGMS2;SGMS2;SGMS2	NM_001136258;NM_152621;NM_001136257;NM_152621	0.00363662	0.045968	0.220203	0.682869	0.462666
cg17781925	MST1;MST1;RNF123	NM_020998;NM_020998;NM_022064	0.00143261	0.0426547	0.200305	0.708872	0.508567
cg05968188	ATXN1;ATXN1	NM_001128164;NM_000332	0.00291403	0.0442236	-0.261594	0.470519	0.732113
cg17486314	BACH2;BACH2	NM_021813;NM_001170794	0.00451305	0.048697	-0.215332	0.409124	0.624455
cg18477569	BACH2;BACH2	NM_021813;NM_001170794	0.000495534	0.0426547	0.205081	0.688611	0.48353
cg21243597	C18orf1;C18orf1	NM_181482;NM_181481	0.00231643	0.0430677	-0.220037	0.467076	0.687112
cg05492904	CYP19A1;CYP19A1	NM_031226;NM_000103	0.00182978	0.0426547	0.222496	0.811077	0.588581
cg04915300	GPD2;GPD2	NM_000408;NM_001083112	0.00143261	0.0426547	0.206827	0.788582	0.581755
cg14768164	GTDC1;GTDC1	NM_001164629;NM_001006636	0.00363662	0.045968	-0.23331	0.465668	0.698978
cg18325315	GTF2IRD1;GTF2IRD1	NM_016328;NM_005685	0.00182978	0.0426547	0.240806	0.799497	0.55869
cg11735008	HIVEP3;HIVEP3	NM_024503;NM_001127714	0.00143261	0.0426547	-0.214841	0.458535	0.673376
cg19092837	KIF1B;KIF1B	NM_015074;NM_183416	0.00143261	0.0426547	0.227333	0.809396	0.582063
cg11839020	LRRC8D;LRRC8D	NM_018103;NM_001134479	0.000857939	0.0426547	-0.21703	0.352374	0.569404
cg00705730	NCK2;NCK2	NM_003581;NM_001004722	0.000857939	0.0426547	0.247707	0.852344	0.604638
cg00799984	NDRG1;NDRG1	NM_001135242;NM_006096	0.00182978	0.0426547	0.246622	0.807584	0.560962
cg20875821	SERPINB2;SERPINB2	NM_001143818;NM_002575	0.00451305	0.048697	0.20341	0.707123	0.503713
cg17448192	ST6GAL1;ST6GAL1	NM_173216;NM_173217	0.000495534	0.0426547	-0.200707	0.458854	0.659562
cg04272820	THRA;THRA	NM_003250;NM_199334	0.00291403	0.0442236	0.212075	0.703237	0.491162
cg12196294	TMCC1;TMCC1	NM_001128224;NM_001017395	0.00143261	0.0426547	0.218991	0.762819	0.543828
cg24841244	CD3D;CD3D;CD3D;CD3D	NM_001040651;NM_000732;NM_001040651;NM_000732	0.00182978	0.0426547	-0.209752	0.551494	0.761247
cg11193767	LIN54;LIN54;LIN54	NM_001115008;NM_194282;NM_001115007	0.00291403	0.0442236	0.234425	0.708003	0.473578
cg23651889	LPP;LPP;LPP	NM_001167672;NM_001167671;NM_005578	0.00363662	0.045968	-0.209125	0.427276	0.636401
cg01073479	NAT15;NAT15;NAT15	NM_001083601;NM_001083600;NM_024845	0.000102805	0.0426547	-0.212747	0.408996	0.621743
cg05344747	CD59;CD59;CD59;CD59	NM_203330;NM_203329;NM_000611;NM_203331	0.00143261	0.0426547	0.229196	0.831056	0.601859
cg01894985	MYLK;MYLK;MYLK;MYLK	NM_053026;NM_053028;NM_053027;NM_053025	0.00143261	0.0426547	-0.200329	0.468753	0.669081
cg07714276	RREB1;RREB1;RREB1;RREB1	NM_001003700;NM_001003699;NM_001168344;NM_001003698	0.00451305	0.048697	0.218618	0.682599	0.463982
cg02111865	YPEL5;YPEL5;YPEL5;YPEL5	NM_001127399;NM_001127401;NM_016061;NM_001127400	0.00363662	0.045968	0.222025	0.760679	0.538654
cg16942632	CAMKK2;CAMKK2;CAMKK2;CAMKK2;CAMKK2;CAMKK2;CAMKK2	NM_172215;NM_172216;NM_006549;NM_172214;NM_153499;NM_153500;NM_172226	0.00231643	0.0430677	0.205085	0.712754	0.507669
cg08930843	ZNF438;ZNF438;ZNF438;ZNF438;ZNF438;ZNF438;ZNF438;ZNF438	NM_001143769;NM_001143768;NM_182755;NM_001143767;NM_001143770;NM_001143766;NM_001143771;NR_026560	0.00291403	0.0442236	0.207863	0.711267	0.503404
cg03330678	SEPT9;SEPT9;SEPT9;SEPT9	NM_006640;NM_001113492;NM_001113491;NM_006640	0.00231643	0.0430677	0.201478	0.628071	0.426593
cg19356022	SHC1;SHC1;SHC1;SHC1	NM_003029;NM_001130041;NM_001130040;NM_183001	0.00451305	0.048697	0.204366	0.704723	0.500357
cg07375836	ACACA;ACACA	NM_198839;NM_198834	0.00451305	0.048697	0.242422	0.58689	0.344468
cg01178899	CXCR6;FYCO1	NM_006564;NM_024513	0.00363662	0.045968	-0.20769	0.563811	0.7715
cg06033531	FAM193B;FAM193B	NM_019057;NR_024019	0.00231643	0.0430677	0.246748	0.728706	0.481958
cg19619956	FAM193B;FAM193B	NM_019057;NR_024019	0.00143261	0.0426547	0.233405	0.838057	0.604652
cg22528270	PRKAG2;PRKAG2	NM_001040633;NM_016203	0.00451305	0.048697	0.20817	0.689346	0.481176
cg05357209	UNC84A;UNC84A	NM_025154;NM_001130965	0.000857939	0.0426547	-0.205145	0.567501	0.772646
cg10471548	RIOK1;RIOK1;RIOK1	NM_153005;NM_031480;NM_153005	0.00291403	0.0442236	0.238802	0.734144	0.495342
cg24489015	LPO;LPO;LPO	NM_006151;NR_027647;NM_001160102	0.00182978	0.0426547	0.219498	0.627866	0.408367
cg17023856	PRKCZ;PRKCZ;PRKCZ	NM_001033582;NM_002744;NM_001033581	0.00363662	0.045968	0.227643	0.742661	0.515018
cg20732703	GRB10;GRB10;GRB10;GRB10	NM_001001555;NM_001001549;NM_005311;NM_001001550	0.000857939	0.0426547	0.220363	0.656946	0.436583
cg12058064	KLHL25;MIR1276	NM_022480;NR_031682	0.00451305	0.048697	0.205776	0.698751	0.492975
cg26647135	PILRB;PILRB;PILRB	NM_175047;NM_178238;NM_013440	0.00363662	0.045968	0.208183	0.820202	0.612019
cg25784280	DTNA;DTNA;DTNA;DTNA;DTNA	NM_001128175;NM_032978;NM_001392;NM_032979;NM_032975	0.00291403	0.0442236	0.212321	0.70443	0.492109
cg18069568	ATP5A1;HAUS1;HAUS1	NM_001001937;NR_026978;NM_138443	0.00363662	0.045968	0.201953	0.704494	0.502541
cg17100176	FAIM3;FAIM3;FAIM3	NM_001142472;NM_005449;NM_001142473	0.00231643	0.0430677	-0.204888	0.404302	0.609189
cg06743610	FXYD1;FXYD1	NM_021902;NM_005031	0.00451305	0.048697	0.238645	0.668594	0.42995
cg18503912	FXYD1;FXYD1	NM_021902;NM_005031	0.00231643	0.0430677	0.236035	0.6895	0.453465
cg15167202	SYNPO;SYNPO	NM_001166208;NM_001166209	0.00231643	0.0430677	0.209629	0.760836	0.551207
cg02098313	THEMIS;THEMIS;THEMIS	NM_001164687;NM_001010923;NM_001164685	0.00363662	0.045968	-0.212301	0.321203	0.533504
cg20267828	THEMIS;THEMIS;THEMIS	NM_001164687;NM_001010923;NM_001164685	0.00182978	0.0426547	-0.253947	0.487317	0.741264
cg13618516	AATK	NM_001080395	0.00363662	0.045968	0.236284	0.7888	0.552516
cg20814202	AATK	NM_001080395	0.00451305	0.048697	0.220612	0.754046	0.533434
cg23334433	AATK	NM_001080395	0.00182978	0.0426547	0.259695	0.761562	0.501867
cg26783127	AATK	NM_001080395	0.00363662	0.045968	0.244633	0.750349	0.505716
cg01692842	ACAD8	NM_014384	0.00291403	0.0442236	0.251127	0.816934	0.565808
cg19037107	ACAD8	NM_014384	0.00182978	0.0426547	0.238566	0.855023	0.616457
cg20203469	ACAD8	NM_014384	0.000857939	0.0426547	0.222654	0.865386	0.642732
cg08324090	ACAP1	NM_014716	0.00111458	0.0426547	0.208147	0.79314	0.584993
cg18038894	ACSF2	NM_025149	0.00231643	0.0430677	0.227217	0.771877	0.54466
cg26831416	ACTN4	NM_004924	0.00451305	0.048697	0.205185	0.687354	0.482169
cg16162590	ADRA1B	NM_000679	0.00143261	0.0426547	-0.21231	0.411923	0.624233
cg01400750	ANAPC10	NM_014885	0.00143261	0.0426547	0.232561	0.721045	0.488483
cg00277591	ANKFY1	NM_016376	0.00231643	0.0430677	-0.22529	0.475681	0.700971
cg02052762	ANKFY1	NM_016376	0.00291403	0.0442236	0.232767	0.768733	0.535966
cg13468144	ANKFY1	NM_016376	0.00291403	0.0442236	0.24849	0.821087	0.572597
cg27183791	ANKRD11	NM_013275	0.00143261	0.0426547	-0.211529	0.40197	0.6135
cg24786875	ANKRD32	NM_032290	0.00143261	0.0426547	0.22346	0.745967	0.522508
cg11478024	ANKS1A	NM_015245	0.00363662	0.045968	0.258478	0.798468	0.53999
cg26338428	ARHGAP10	NM_024605	0.00182978	0.0426547	-0.215221	0.554607	0.769828
cg12058385	ARHGAP15	NM_018460	0.00231643	0.0430677	0.200926	0.821415	0.620489
cg20760057	ARHGAP18	NM_033515	0.00231643	0.0430677	0.235341	0.716499	0.481158
cg01607321	ARHGEF10	NM_014629	0.00231643	0.0430677	0.200098	0.722519	0.522421
cg22062741	ARHGEF10	NM_014629	0.00363662	0.045968	0.225134	0.767949	0.542815
cg16451527	ARHGEF3	NM_001128615	0.000656027	0.0426547	0.240265	0.78975	0.549485
cg04722215	ARID5A	NM_212481	0.00451305	0.048697	-0.225528	0.352437	0.577965
cg05928849	ASAM	NM_024769	0.00291403	0.0442236	0.214708	0.696327	0.481619
cg27627524	ASAP1	NM_018482	0.00231643	0.0430677	0.22033	0.647184	0.426853
cg24165638	AZU1	NM_001700	0.00231643	0.0430677	0.208458	0.791957	0.583498
cg19877683	B3GNTL1	NM_001009905	0.00231643	0.0430677	0.214015	0.819607	0.605592
cg15942979	BIN3	NM_018688	0.00451305	0.048697	-0.201281	0.455099	0.65638
cg19676553	BRF1	NM_001519	0.00291403	0.0442236	0.22943	0.790456	0.561025
cg13852284	C10orf11	NM_032024	0.00182978	0.0426547	0.254992	0.807393	0.552401
cg22991506	C14orf182	NM_001012706	0.00451305	0.048697	-0.223808	0.360321	0.584129
cg00263248	C14orf64	NR_015430	0.00231643	0.0430677	-0.212117	0.498282	0.710399
cg11354682	C19orf38	NM_001136482	0.000857939	0.0426547	-0.278944	0.422911	0.701856
cg20661985	C20orf3	NM_020531	0.00451305	0.048697	0.209144	0.786317	0.577173
cg11908131	C2orf40	NM_032411	0.00451305	0.048697	0.225705	0.818134	0.592429
cg20780105	C5orf43	NM_001048249	0.00451305	0.048697	0.217842	0.734462	0.51662
cg21762728	C6orf70	NM_018341	0.00182978	0.0426547	0.241184	0.842572	0.601387
cg01618151	C6orf81	NM_145028	0.00363662	0.045968	0.206836	0.709877	0.503041
cg21216258	CACNA1B	NM_000718	0.00143261	0.0426547	0.216766	0.729443	0.512677
cg04334723	CALR	NM_004343	0.00291403	0.0442236	0.200544	0.659649	0.459105
cg25605731	CALR	NM_004343	0.00363662	0.045968	0.254772	0.745815	0.491043
cg00968167	CAPZB	NM_004930	0.00182978	0.0426547	-0.200779	0.368803	0.569583
cg14985891	CASQ2	NM_001232	0.00231643	0.0430677	0.232207	0.760663	0.528456
cg19114543	CCDC12	NM_144716	0.00143261	0.0426547	0.227669	0.720604	0.492935
cg21577598	CCDC57	NM_198082	0.00182978	0.0426547	-0.248343	0.322058	0.5704
cg20217257	CCDC88B	NM_032251	0.00182978	0.0426547	0.229419	0.763406	0.533987
cg14214797	CCDC88C	NM_001080414	0.00291403	0.0442236	-0.205549	0.476265	0.681814
cg06164961	CD3E	NM_000733	0.00182978	0.0426547	-0.215415	0.568909	0.784324
cg02713832	CD6	NM_006725	0.00037128	0.0426547	-0.216977	0.382101	0.599078
cg21057323	CDC42BPB	NM_006035	0.000495534	0.0426547	-0.228141	0.287435	0.515577
cg25664938	CDGAP	NM_020754	0.000857939	0.0426547	0.229984	0.782737	0.552753
cg20488123	CDKAL1	NM_017774	0.00363662	0.045968	-0.251733	0.362766	0.614499
cg23181133	CEACAM3	NM_001815	0.00037128	0.0426547	0.202917	0.760218	0.557301
cg11070172	CEBPE	NM_001805	0.000656027	0.0426547	0.205375	0.78942	0.584045
cg05971678	CHST15	NM_015892	0.00231643	0.0430677	0.241214	0.804081	0.562867
cg18924562	CLEC1A	NM_016511	0.000201172	0.0426547	-0.216175	0.547182	0.763357
cg22799499	COL9A2	NM_001852	0.00231643	0.0430677	0.21219	0.722179	0.509989
cg12216435	COPG	NM_016128	0.00451305	0.048697	-0.211707	0.268805	0.480512
cg08036492	COX10	NM_001303	0.00291403	0.0442236	0.256309	0.766289	0.509979
cg25739938	CPSF3	NM_016207	0.00143261	0.0426547	0.27853	0.835659	0.557128
cg16268734	CS	NM_004077	0.00182978	0.0426547	0.205486	0.772674	0.567188
cg01474011	CUL3	NM_003590	0.00291403	0.0442236	0.221567	0.735981	0.514413
cg15228694	CYB5R2	NM_016229	0.000495534	0.0426547	0.246606	0.768297	0.521691
cg08413427	DBF4B	NM_145663	0.00143261	0.0426547	0.214139	0.73948	0.52534
cg04344000	DCBLD1	NM_173674	0.00143261	0.0426547	-0.226647	0.50808	0.734727
cg11014468	DCP1A	NM_018403	0.00182978	0.0426547	0.267438	0.833121	0.565682
cg26518580	DENND2D	NM_024901	0.00291403	0.0442236	-0.209333	0.503968	0.713301
cg09859659	DENND3	NM_014957	0.00143261	0.0426547	0.245916	0.833884	0.587968
cg12809098	DENND3	NM_014957	0.00231643	0.0430677	0.228321	0.848884	0.620563
cg15891546	DENND3	NM_014957	0.00182978	0.0426547	0.217238	0.783719	0.566481
cg25472296	DOCK1	NM_001380	0.00451305	0.048697	0.203002	0.810816	0.607814
cg27185978	DOCK5	NM_024940	0.00291403	0.0442236	0.219972	0.745577	0.525605
cg07472373	DRGX	NM_001080520	0.00363662	0.045968	0.24813	0.801896	0.553766
cg08628635	E2F3	NM_001949	0.00451305	0.048697	0.235859	0.756928	0.52107
cg07996532	ECE1	NM_001113348	0.00291403	0.0442236	-0.203267	0.326321	0.529587
cg10028625	ECT2	NM_018098	0.00182978	0.0426547	0.243443	0.821627	0.578185
cg25448856	EEA1	NM_003566	0.00231643	0.0430677	0.223156	0.814082	0.590926
cg08078028	EIF3A	NM_003750	0.00182978	0.0426547	0.22776	0.827488	0.599727
cg16998950	ELL2	NM_012081	0.00451305	0.048697	0.229806	0.785993	0.556188
cg01119452	ELMO1	NM_014800	0.00231643	0.0430677	0.204297	0.641888	0.437591
cg05642546	ELMO1	NM_014800	0.00291403	0.0442236	0.247632	0.685968	0.438336
cg20086579	ELOF1	NM_032377	0.00363662	0.045968	-0.207332	0.468473	0.675805
cg07092111	EPC1	NM_025209	0.00363662	0.045968	-0.214526	0.33394	0.548465
cg07496207	ERGIC1	NM_001031711	0.00143261	0.0426547	0.278407	0.76053	0.482123
cg03295554	ETS1	NM_001143820	0.00143261	0.0426547	-0.227132	0.413807	0.640939
cg00168694	ETS2	NM_005239	0.00231643	0.0430677	0.252084	0.740495	0.488411
cg17813891	EVL	NM_016337	0.00363662	0.045968	-0.241844	0.397892	0.639736
cg13992008	FAM102A	NM_001035254	0.00231643	0.0430677	-0.20081	0.533844	0.734655
cg13618969	FAM125B	NM_033446	0.00111458	0.0426547	0.215486	0.859467	0.643982
cg16713889	FAM161B	NM_152445	0.00231643	0.0430677	0.223183	0.759769	0.536586
cg21515785	FAM174A	NM_198507	0.00231643	0.0430677	0.218177	0.714256	0.496079
cg26434370	FAM18A	NM_001079512	0.00363662	0.045968	0.233846	0.740973	0.507128
cg07578772	FAM194A	NM_152394	0.00451305	0.048697	-0.206897	0.47866	0.685557
cg04682905	FBXL18	NM_024963	0.00363662	0.045968	0.205232	0.750285	0.545052
cg11554295	FBXL18	NM_024963	0.00291403	0.0442236	0.201959	0.723852	0.521893
cg02832512	FLJ22536	NR_015410	0.00111458	0.0426547	0.211092	0.7755	0.564408
cg21761853	FLOT1	NM_005803	0.00111458	0.0426547	-0.203527	0.229864	0.433391
cg20227511	FLT3	NM_004119	0.00143261	0.0426547	0.213376	0.793905	0.580529
cg04572930	FOXK1	NM_001037165	0.00182978	0.0426547	0.20482	0.756523	0.551703
cg11244402	FOXO1	NM_002015	0.00111458	0.0426547	-0.217361	0.304898	0.522259
cg08173709	FOXP1	NM_032682	0.00143261	0.0426547	0.201013	0.834366	0.633353
cg12828656	FSTL4	NM_015082	0.00231643	0.0430677	0.203612	0.6578	0.454188
cg07212384	GAL3ST4	NM_024637	0.00231643	0.0430677	-0.237404	0.425185	0.66259
cg15739581	GALNT3	NM_004482	0.00363662	0.045968	0.240655	0.757508	0.516853
cg21574244	GANC	NM_198141	0.00231643	0.0430677	0.249895	0.764735	0.51484
cg01402255	GATAD2B	NM_020699	0.00231643	0.0430677	0.244104	0.70787	0.463767
cg22689323	GML	NM_002066	0.00231643	0.0430677	-0.223772	0.526878	0.750649
cg25554496	GNA13	NM_006572	0.00143261	0.0426547	-0.260705	0.495009	0.755714
cg22713444	GNRHR2	NR_002328	0.00451305	0.048697	0.248468	0.741836	0.493368
cg22226592	GPSM2	NM_013296	0.00451305	0.048697	0.2098	0.791075	0.581275
cg18430255	GRK5	NM_005308	0.00111458	0.0426547	-0.234043	0.507462	0.741504
cg08140114	HECA	NM_016217	0.00291403	0.0442236	-0.244808	0.423109	0.667917
cg23280720	HECA	NM_016217	0.00291403	0.0442236	-0.277859	0.329414	0.607272
cg15015109	HELZ	NM_014877	0.00143261	0.0426547	0.224202	0.725841	0.501639
cg06732873	HERPUD2	NM_022373	0.00291403	0.0442236	-0.221622	0.470559	0.692181
cg08351131	HEXIM2	NM_144608	0.00231643	0.0430677	0.207921	0.661835	0.453915
cg25444339	HIP1	NM_005338	0.00363662	0.045968	0.204912	0.643819	0.438907
cg21578596	HLA-DMB	NM_002118	0.00363662	0.045968	0.203287	0.594001	0.390714
cg21366673	HLA-E	NM_005516	0.00363662	0.045968	-0.211768	0.422459	0.634227
cg06474225	HTRA1	NM_002775	0.00182978	0.0426547	0.235385	0.652382	0.416997
cg09018107	IL12RB2	NM_001559	0.00291403	0.0442236	-0.248743	0.502165	0.750908
cg14849855	IL12RB2	NM_001559	0.00182978	0.0426547	-0.229542	0.467631	0.697172
cg15392364	IL19	NM_153758	0.00231643	0.0430677	-0.264036	0.45142	0.715455
cg06392753	IL1R1	NM_000877	0.000857939	0.0426547	0.265688	0.683938	0.41825
cg07363330	IL31RA	NM_139017	0.00231643	0.0430677	0.217592	0.69056	0.472968
cg01040749	INPP5A	NM_005539	0.00111458	0.0426547	0.232305	0.859056	0.626751
cg09163720	INPP5A	NM_005539	0.000656027	0.0426547	0.249298	0.821263	0.571965
cg06758539	IQGAP2	NM_006633	0.00143261	0.0426547	0.242362	0.788158	0.545796
cg15375424	IRF1	NM_002198	0.00231643	0.0430677	-0.228349	0.435977	0.664326
cg07069934	ISG20	NM_002201	0.00182978	0.0426547	-0.258116	0.395879	0.653995
cg25338454	ITPR2	NM_002223	0.00143261	0.0426547	0.212363	0.846234	0.633871
cg05255811	KCNK5	NM_003740	0.00111458	0.0426547	0.206051	0.716444	0.510393
cg24880665	KDM5B	NM_006618	0.000656027	0.0426547	0.223433	0.74871	0.525277
cg03714676	KIAA0146	NM_001080394	0.00231643	0.0430677	0.213369	0.748676	0.535307
cg14547461	KIAA0146	NM_001080394	0.00111458	0.0426547	0.20953	0.782584	0.573054
cg16396191	KIAA0564	NM_015058	0.000857939	0.0426547	0.264906	0.832822	0.567917
cg13221924	KIAA0753	NM_014804	0.00291403	0.0442236	0.229605	0.760926	0.531321
cg25752703	KIAA1257	NM_020741	0.00363662	0.045968	0.206966	0.713683	0.506717
cg11721610	KIF14	NM_014875	0.00291403	0.0442236	0.212178	0.552822	0.340645
cg07561747	KIF21B	NM_017596	0.00182978	0.0426547	0.25146	0.754932	0.503472
cg18535415	KIF21B	NM_017596	0.000656027	0.0426547	0.226051	0.689383	0.463331
cg19368911	KIF26B	NM_018012	0.00111458	0.0426547	-0.20317	0.486248	0.689418
cg27416489	KIF5C	NM_004522	0.00231643	0.0430677	0.218	0.825529	0.607529
cg05008854	KIN	NM_012311	0.00182978	0.0426547	0.26569	0.770438	0.504748
cg14281591	KLF5	NM_001730	0.00231643	0.0430677	0.208501	0.802552	0.594052
cg22074114	KY	NM_178554	0.00363662	0.045968	0.202315	0.733827	0.531512
cg18030943	LAMP3	NM_014398	0.00291403	0.0442236	-0.202618	0.517363	0.719981
cg19510565	LAPTM5	NM_006762	0.00291403	0.0442236	-0.243712	0.342342	0.586054
cg05931497	LARP4B	NM_015155	0.00182978	0.0426547	0.205773	0.527169	0.321396
cg24827600	LASS6	NM_203463	0.000201172	0.0426547	0.261251	0.807352	0.546102
cg17250262	LBH	NM_030915	0.00451305	0.048697	-0.211036	0.340373	0.551409
cg16964946	LGR4	NM_018490	0.00182978	0.0426547	0.258445	0.809853	0.551408
cg25437886	LIMD1	NM_014240	0.00363662	0.045968	0.249335	0.777567	0.528231
cg07516556	LPCAT1	NM_024830	0.00182978	0.0426547	0.245056	0.748815	0.503759
cg24011073	LPIN1	NM_145693	0.000857939	0.0426547	0.215338	0.566616	0.351278
cg10233454	LRP1	NM_002332	0.000857939	0.0426547	0.208388	0.6704	0.462012
cg12016746	LRP5	NM_002335	0.00451305	0.048697	0.214659	0.706059	0.4914
cg22228439	LRRC41	NM_006369	0.00182978	0.0426547	0.220333	0.695228	0.474895
cg16291589	LRRN4	NM_152611	0.00182978	0.0426547	0.221606	0.843688	0.622081
cg23353000	LSM12	NM_152344	0.00291403	0.0442236	0.20272	0.694459	0.491739
cg23732024	LY96	NM_015364	0.00111458	0.0426547	-0.203272	0.51427	0.717542
cg01406317	Magmas	NM_016069	0.00231643	0.0430677	0.221119	0.726512	0.505393
cg13995774	MAML1	NM_014757	0.00451305	0.048697	0.252334	0.718678	0.466345
cg03418002	MAML3	NM_018717	0.00291403	0.0442236	0.255731	0.7874	0.53167
cg02193956	MANBA	NM_005908	0.00231643	0.0430677	0.221095	0.748581	0.527486
cg26814100	MAP7	NM_003980	0.00231643	0.0430677	0.203342	0.851498	0.648156
cg00211174	MCM2	NM_004526	0.00291403	0.0442236	0.244092	0.743363	0.499271
cg12678686	MCM2	NM_004526	0.00182978	0.0426547	0.246395	0.770117	0.523722
cg06633438	MLLT1	NM_005934	0.00143261	0.0426547	0.247233	0.690994	0.443762
cg12182708	MMS19	NM_022362	0.00451305	0.048697	0.215993	0.747512	0.531519
cg00789960	MNAT1	NM_002431	0.00291403	0.0442236	0.224092	0.848716	0.624624
cg23825480	MORC2	NM_014941	0.00363662	0.045968	-0.232674	0.326857	0.559531
cg05957730	MPHOSPH10	NM_005791	0.00143261	0.0426547	0.216774	0.741359	0.524586
cg07630255	MPI	NM_002435	0.00291403	0.0442236	-0.208317	0.491981	0.700298
cg04266202	MPO	NM_000250	0.00231643	0.0430677	0.207736	0.759374	0.551638
cg15044453	MTHFD1L	NM_015440	0.00363662	0.045968	0.208693	0.798157	0.589465
cg03717755	MYLIP	NM_013262	0.000857939	0.0426547	-0.20501	0.45481	0.65982
cg22798362	MYO1D	NM_015194	0.00291403	0.0442236	-0.233054	0.563094	0.796148
cg00343906	NADK	NM_023018	0.00363662	0.045968	0.220849	0.729375	0.508526
cg03146219	NADSYN1	NM_018161	0.00291403	0.0442236	0.268188	0.812148	0.54396
cg11357013	NEO1	NM_002499	0.00363662	0.045968	0.211974	0.752038	0.540064
cg20636714	NET1	NM_001047160	0.00363662	0.045968	-0.201111	0.484945	0.686056
cg00689225	NFKBIA	NM_020529	0.00363662	0.045968	-0.219865	0.444152	0.664017
cg26837399	NID1	NM_002508	0.00231643	0.0430677	0.246752	0.692874	0.446122
cg06059360	NKTR	NM_005385	0.00182978	0.0426547	0.221916	0.828458	0.606542
cg05475440	NLK	NM_016231	0.00451305	0.048697	0.217772	0.623858	0.406085
cg20241876	NOTCH4	NM_004557	0.00231643	0.0430677	0.222778	0.697212	0.474434
cg12709880	NPC1	NM_000271	0.000656027	0.0426547	0.270943	0.828038	0.557095
cg15520845	NUCKS1	NM_022731	0.00182978	0.0426547	0.258408	0.848507	0.590099
cg06526020	NUDT3	NM_006703	0.00182978	0.0426547	0.254171	0.834995	0.580824
cg13048008	NUMA1	NM_006185	0.00182978	0.0426547	0.209362	0.649433	0.440071
cg02570354	OSBPL10	NM_017784	0.00363662	0.045968	0.224879	0.647002	0.422123
cg10789050	OSBPL10	NM_017784	0.00111458	0.0426547	0.20434	0.642937	0.438596
cg04855678	OSTalpha	NM_152672	0.00182978	0.0426547	0.247489	0.731457	0.483969
cg16456087	OXNAD1	NM_138381	0.00291403	0.0442236	-0.212883	0.406995	0.619878
cg27200257	P4HB	NM_000918	0.00182978	0.0426547	0.268344	0.728397	0.460053
cg17547928	PCGF3	NM_006315	0.000857939	0.0426547	0.222324	0.693596	0.471272
cg21285555	PCMTD1	NM_052937	0.00231643	0.0430677	0.28529	0.762934	0.477645
cg13438337	PCSK5	NM_006200	0.00363662	0.045968	0.238859	0.796335	0.557476
cg18729704	PDCD11	NM_014976	0.00143261	0.0426547	0.220791	0.774608	0.553817
cg09109411	PDE6A	NM_000440	0.00451305	0.048697	0.218577	0.781558	0.562981
cg14864167	PDE7A	NM_002604	0.000274392	0.0426547	-0.240922	0.379204	0.620126
cg23975251	PEX14	NM_004565	0.00182978	0.0426547	-0.218468	0.361839	0.580307
cg04592811	PIGL	NM_004278	0.00363662	0.045968	0.247688	0.720628	0.47294
cg00661777	PIK3CG	NM_002649	0.00451305	0.048697	-0.234604	0.326686	0.56129
cg24967811	PITPNM2	NM_020845	0.00143261	0.0426547	0.287039	0.731404	0.444365
cg26541218	PKD1L1	NM_138295	0.00182978	0.0426547	0.202164	0.655775	0.453611
cg13469851	PLAA	NM_001031689	0.00231643	0.0430677	0.249086	0.817559	0.568473
cg00453717	POLD3	NM_006591	0.00291403	0.0442236	0.230306	0.748392	0.518087
cg01676795	POR	NM_000941	0.00143261	0.0426547	0.209507	0.857204	0.647697
cg25844590	PPFIBP2	NM_003621	0.000857939	0.0426547	0.205621	0.809707	0.604087
cg24906819	PRAGMIN	NM_001080826	0.00291403	0.0442236	0.248409	0.743466	0.495057
cg02307823	PTEN	NM_000314	0.00451305	0.048697	0.228487	0.792957	0.56447
cg20516032	PVT1	NR_003367	0.00451305	0.048697	-0.243828	0.464483	0.70831
cg15572396	PXK	NM_017771	0.00231643	0.0430677	0.214189	0.724578	0.51039
cg24175188	PXK	NM_017771	0.000201172	0.0426547	0.23667	0.776176	0.539506
cg23502204	RAB38	NM_022337	0.00451305	0.048697	0.214059	0.822419	0.60836
cg08622666	RANBP9	NM_005493	0.00363662	0.045968	-0.266787	0.442819	0.709606
cg06380691	RASA3	NM_007368	0.00143261	0.0426547	0.252216	0.649767	0.397552
cg10800346	RASA3	NM_007368	0.00451305	0.048697	0.20077	0.743454	0.542684
cg20146241	RCAN3	NM_013441	0.00111458	0.0426547	-0.230036	0.215634	0.445671
cg14543285	RCOR1	NM_015156	0.00182978	0.0426547	0.21359	0.813133	0.599543
cg05991009	RFX8	NM_001145664	0.00291403	0.0442236	0.216036	0.744197	0.528161
cg22400420	RGL1	NM_015149	0.00143261	0.0426547	0.284307	0.777802	0.493495
cg13573582	RNF220	NM_018150	0.00111458	0.0426547	0.201284	0.697504	0.49622
cg01393945	ROPN1L	NM_031916	0.00231643	0.0430677	0.206187	0.758793	0.552607
cg07569288	RPS11	NM_001015	0.00291403	0.0442236	-0.210629	0.456134	0.666763
cg13413384	RXRA	NM_002957	0.00231643	0.0430677	0.218446	0.734187	0.515741
cg17972213	S1PR1	NM_001400	0.00451305	0.048697	-0.228223	0.451007	0.679229
cg13870520	SCARB2	NM_005506	0.00231643	0.0430677	0.223808	0.724131	0.500323
cg15029631	SCN8A	NM_014191	0.000656027	0.0426547	0.227149	0.795796	0.568647
cg14516183	SEC22A	NM_012430	0.00231643	0.0430677	0.244751	0.80416	0.559408
cg16640599	SEC24D	NM_014822	0.00291403	0.0442236	0.222683	0.730888	0.508205
cg13062455	SEL1L	NM_005065	0.000656027	0.0426547	0.247812	0.771793	0.523981
cg15312943	SERGEF	NM_012139	0.00363662	0.045968	0.223924	0.78517	0.561246
cg23217983	SGIP1	NM_032291	0.00111458	0.0426547	-0.203402	0.460046	0.663448
cg21834463	SGK1	NM_001143676	0.00182978	0.0426547	0.213051	0.738266	0.525215
cg01945624	SH3TC1	NM_018986	0.00182978	0.0426547	-0.202116	0.368842	0.570958
cg26105956	SHE	NM_001010846	0.000495534	0.0426547	0.236791	0.835041	0.598249
cg08195176	SIK3	NM_025164	0.00182978	0.0426547	0.247823	0.808108	0.560284
cg25139649	SKI	NM_003036	0.00451305	0.048697	0.204792	0.621228	0.416436
cg18997983	SLC12A7	NM_006598	0.000656027	0.0426547	0.204472	0.668579	0.464108
cg26426488	SLC12A9	NM_020246	0.00451305	0.048697	0.201223	0.552737	0.351514
cg19717347	SLC15A4	NM_145648	0.00231643	0.0430677	0.239684	0.782769	0.543085
cg24058365	SLC16A4	NM_004696	0.00291403	0.0442236	0.226928	0.745748	0.51882
cg10011091	SLC25A32	NM_030780	0.00291403	0.0442236	0.2317	0.664602	0.432901
cg02061660	SLC25A46	NM_138773	0.00451305	0.048697	-0.210248	0.506599	0.716847
cg13869484	SLC2A5	NR_024180	0.00363662	0.045968	-0.222295	0.361381	0.583675
cg09050775	SLC38A2	NM_018976	0.00111458	0.0426547	-0.210477	0.465069	0.675547
cg13603332	SLC44A1	NM_080546	0.00231643	0.0430677	0.205135	0.702463	0.497328
cg13474450	SLC45A4	NM_001080431	0.00182978	0.0426547	0.223813	0.81877	0.594957
cg18720622	SLC6A18	NM_182632	0.00291403	0.0442236	-0.22735	0.420799	0.648149
cg17567562	SMARCC1	NM_003074	0.000857939	0.0426547	0.221881	0.840052	0.618171
cg02226672	SMPD3	NM_018667	0.00231643	0.0430677	0.204849	0.758003	0.553154
cg10876767	SORCS2	NM_020777	0.00231643	0.0430677	0.206174	0.62648	0.420306
cg16384864	SPATA21	NM_198546	0.000857939	0.0426547	-0.237376	0.333411	0.570788
cg19782686	SPATA5	NM_145207	0.00111458	0.0426547	0.216886	0.676567	0.459681
cg08534016	SPEF2	NM_024867	0.00291403	0.0442236	0.201527	0.782949	0.581422
cg17036458	SSH2	NM_033389	0.00451305	0.048697	0.233252	0.764422	0.531169
cg19048010	SSH2	NM_033389	0.00363662	0.045968	-0.215879	0.453065	0.668944
cg03658236	STAB2	NM_017564	0.00363662	0.045968	0.232559	0.770442	0.537883
cg20977312	STC2	NM_003714	0.00291403	0.0442236	0.213483	0.832163	0.61868
cg02770745	STIM1	NM_003156	0.00291403	0.0442236	0.225846	0.796715	0.570869
cg11022926	STK17A	NM_004760	0.00182978	0.0426547	-0.235996	0.503686	0.739682
cg23954655	STK24	NM_001032296	0.00291403	0.0442236	-0.262953	0.232302	0.495255
cg10206397	STK35	NM_080836	0.00182978	0.0426547	0.237929	0.839919	0.60199
cg03351487	STK39	NM_013233	0.00143261	0.0426547	0.21232	0.842558	0.630239
cg11723077	SYNJ2	NM_003898	0.00143261	0.0426547	0.207499	0.649468	0.441969
cg01521397	TAF4	NM_003185	0.00143261	0.0426547	0.254608	0.766889	0.512281
cg17626301	TAP1	NM_000593	0.00182978	0.0426547	-0.232949	0.509779	0.742729
cg26234900	TAP1	NM_000593	0.00231643	0.0430677	-0.213686	0.510888	0.724575
cg17161520	TBC1D10C	NM_198517	0.00363662	0.045968	-0.266005	0.353454	0.619459
cg13709496	TBC1D2	NM_018421	0.00291403	0.0442236	0.209862	0.69576	0.485897
cg03778909	TBCD	NM_005993	0.00111458	0.0426547	0.267631	0.757354	0.489723
cg17852482	TBCD	NM_005993	0.00231643	0.0430677	0.257981	0.80415	0.546169
cg14210726	TMC8	NM_152468	0.00231643	0.0430677	0.212603	0.706864	0.494261
cg20628942	TMCO3	NM_017905	0.000857939	0.0426547	0.221202	0.731461	0.510259
cg27428551	TMEM120B	NM_001080825	0.00182978	0.0426547	0.204869	0.863337	0.658468
cg18507018	TMEM55A	NM_018710	0.00451305	0.048697	0.229561	0.806049	0.576488
cg26341831	TMEM63A	NM_014698	0.00363662	0.045968	-0.298806	0.281369	0.580175
cg03406844	TNFAIP6	NM_007115	0.00291403	0.0442236	0.200922	0.835499	0.634577
cg01057573	TNFAIP8	NM_001077654	0.00231643	0.0430677	0.248797	0.75298	0.504183
cg05599723	TNFRSF1B	NM_001066	0.00363662	0.045968	0.205901	0.751222	0.545321
cg15526535	TNFRSF1B	NM_001066	0.00143261	0.0426547	-0.213752	0.521239	0.734991
cg03055671	TNFSF10	NM_003810	0.00363662	0.045968	-0.230908	0.266801	0.49771
cg20819482	TNKS	NM_003747	0.00182978	0.0426547	0.206956	0.823611	0.616655
cg06898168	TNRC18	NM_001080495	0.00182978	0.0426547	0.213928	0.712333	0.498406
cg03156546	TNRC6A	NM_014494	0.00451305	0.048697	0.225247	0.742528	0.517281
cg04244170	TOMM70A	NM_014820	0.00363662	0.045968	0.238258	0.763859	0.525601
cg00852924	TOR3A	NM_022371	0.00363662	0.045968	0.216448	0.685883	0.469435
cg14333394	TRAF2	NM_021138	0.00182978	0.0426547	0.201809	0.73147	0.52966
cg11854981	TRERF1	NM_033502	0.00231643	0.0430677	0.209943	0.681554	0.471611
cg02160684	TRIB1	NM_025195	0.00143261	0.0426547	0.222622	0.805137	0.582514
cg00259404	TRIM27	NM_006510	0.00291403	0.0442236	0.227758	0.718237	0.490479
cg08279189	TRIM27	NM_006510	0.00291403	0.0442236	0.208299	0.831844	0.623545
cg11389756	TRIM27	NM_006510	0.00363662	0.045968	0.228743	0.7604	0.531656
cg14059339	TRIM27	NM_006510	0.00363662	0.045968	0.211272	0.809688	0.598416
cg17344091	TRIM27	NM_006510	0.00363662	0.045968	0.245476	0.71451	0.469034
cg12547959	TRIO	NM_007118	0.00363662	0.045968	0.20396	0.752248	0.548288
cg12157761	UACA	NM_018003	0.00451305	0.048697	0.219141	0.784659	0.565518
cg08837215	UBE2O	NM_022066	0.00291403	0.0442236	0.218625	0.788607	0.569982
cg26959655	UBR5	NM_015902	0.00231643	0.0430677	0.213	0.695835	0.482835
cg10972897	UCK2	NM_012474	0.00451305	0.048697	0.232774	0.674249	0.441474
cg18118738	UHRF1BP1	NM_017754	0.00182978	0.0426547	0.204591	0.737683	0.533092
cg03562367	USP25	NM_013396	0.00143261	0.0426547	-0.214824	0.351491	0.566315
cg11952340	USP3	NM_006537	0.00182978	0.0426547	0.21971	0.767175	0.547464
cg08842616	VAC14	NM_018052	0.00111458	0.0426547	0.202575	0.734302	0.531727
cg15075988	VDAC2	NM_003375	0.00291403	0.0442236	0.252151	0.751224	0.499072
cg13860281	VOPP1	NM_030796	0.00291403	0.0442236	-0.216755	0.513177	0.729932
cg01718139	VSTM1	NM_198481	0.00231643	0.0430677	0.223105	0.773386	0.550281
cg12691572	VTI1A	NM_145206	0.00231643	0.0430677	0.226131	0.67709	0.450959
cg16660547	VTI1A	NM_145206	0.00291403	0.0442236	0.202817	0.790731	0.587914
cg15457217	WDFY1	NM_020830	0.00231643	0.0430677	0.224234	0.851517	0.627283
cg14315912	WDR20	NM_181291	0.00291403	0.0442236	0.203212	0.819843	0.616631
cg25197500	WDR45L	NM_019613	0.00291403	0.0442236	0.217141	0.785187	0.568046
cg04903759	WDR49	NM_178824	0.00363662	0.045968	0.224533	0.769085	0.544552
cg25124300	XDH	NM_000379	0.00363662	0.045968	0.210385	0.719284	0.508899
cg11845168	XPO4	NM_022459	0.00231643	0.0430677	0.216124	0.69991	0.483786
cg11210357	ZC3H3	NM_015117	0.00111458	0.0426547	-0.202648	0.550933	0.753581
cg16727006	ZCCHC14	NM_015144	0.00451305	0.048697	-0.211458	0.559888	0.771346
cg04904468	ZCCHC24	NM_153367	0.00231643	0.0430677	0.225672	0.78671	0.561038
cg01424562	ZFP36L1	NM_004926	0.00363662	0.045968	-0.205002	0.503906	0.708909
cg08169020	ZFP36L1	NM_004926	0.00451305	0.048697	-0.207655	0.299523	0.507177
cg10099732	ZFP36L1	NM_004926	0.00363662	0.045968	-0.206249	0.40773	0.613979
cg11814087	ZFR	NM_016107	0.00182978	0.0426547	0.221035	0.757981	0.536946
cg21199093	ZMYM4	NM_005095	0.00451305	0.048697	0.210552	0.697241	0.486689
cg13733708	ZNF335	NM_022095	0.00143261	0.0426547	0.244805	0.754945	0.510141
cg04425005	ZNF827	NM_178835	0.00231643	0.0430677	0.219604	0.794617	0.575013
cg07091220	ZNF827	NM_178835	0.00451305	0.048697	0.212181	0.740822	0.528641
cg06122230	ZNFX1	NM_021035	0.00291403	0.0442236	0.207566	0.80635	0.598784
cg00942920	LAX1;LAX1;LAX1	NM_001136190;NM_017773;NM_017773	0.00111458	0.0426547	-0.201484	0.299114	0.500598
cg08399444	GSG1;GSG1;GSG1;GSG1;GSG1;GSG1	NM_001080555;NM_153823;NM_031289;NM_031289;NM_001080554;NM_153823	0.00451305	0.048697	0.254586	0.774486	0.5199
cg11826104	UBE3A;UBE3A;UBE3A;UBE3A	NM_000462;NM_130838;NM_130838;NM_130839	0.00231643	0.0430677	0.22374	0.837705	0.613965
cg25225693	GATS;GATS;PVRIG;GATS;PVRIG;GATS	NR_028040;NM_178831;NM_024070;NR_028038;NM_024070;NR_028039	0.000656027	0.0426547	-0.206508	0.493256	0.699764
cg17262810	CCNY;CCNY	NM_145012;NM_181698	0.00451305	0.048697	0.211934	0.736633	0.524699
cg06784232	CSGALNACT1;CSGALNACT1	NR_024040;NM_018371	0.00182978	0.0426547	0.210623	0.804298	0.593675
cg27510066	CSGALNACT1;CSGALNACT1	NR_024040;NM_018371	0.00111458	0.0426547	0.220175	0.819919	0.599744
cg14774440	RAB11FIP1;RAB11FIP1;RAB11FIP1;RAB11FIP1	NM_025151;NM_001002233;NM_001002233;NM_001002814	0.00291403	0.0442236	0.224194	0.622218	0.398024
cg14454680	C3orf26;FILIP1L;FILIP1L	NM_032359;NM_182909;NM_001042459	0.000656027	0.0426547	0.27906	0.758065	0.479005
cg19635401	C6orf204;PLN;C6orf204	NM_206921;NM_002667;NM_001042475	0.00143261	0.0426547	0.255774	0.765959	0.510184
cg19607845	FBXO9;FBXO9;FBXO9	NM_033480;NM_033481;NM_012347	0.000656027	0.0426547	0.273549	0.728489	0.454941
cg18462898	LOC729991-MEF2B;LOC729991-MEF2B;MEF2B;LOC729991-MEF2B	NR_027308;NM_005919;NM_001145785;NR_027307	0.000656027	0.0426547	0.25667	0.786634	0.529965
cg23210971	AFF1;AFF1	NM_001166693;NM_005935	0.00182978	0.0426547	0.247396	0.816931	0.569536
cg27315109	AFF3;AFF3	NM_001025108;NM_002285	0.00231643	0.0430677	-0.231542	0.49939	0.730933
cg08248297	AP1M1;AP1M1	NM_032493;NM_001130524	0.00231643	0.0430677	0.206979	0.82267	0.615691
cg01016119	ARHGEF3;ARHGEF3	NM_001128615;NM_019555	0.00182978	0.0426547	-0.223353	0.3296	0.552954
cg07379703	ARSB;ARSB	NM_000046;NM_198709	0.00291403	0.0442236	0.212498	0.792156	0.579658
cg13622546	ASB6;ASB6	NM_177999;NM_017873	0.00182978	0.0426547	0.201764	0.804143	0.602378
cg15549637	ATXN7L1;ATXN7L1	NM_152749;NM_020725	0.00143261	0.0426547	-0.231983	0.407424	0.639407
cg16778107	AXIN1;AXIN1	NM_003502;NM_181050	0.000857939	0.0426547	0.209544	0.70372	0.494177
cg05597945	BANP;BANP	NM_017869;NM_079837	0.000201172	0.0426547	0.203877	0.572357	0.36848
cg07018090	BANP;BANP	NM_017869;NM_079837	0.000102805	0.0426547	-0.21098	0.523235	0.734215
cg10509607	BCL11B;BCL11B	NM_022898;NM_138576	0.000857939	0.0426547	-0.215948	0.465835	0.681783
cg14296561	BIRC3;BIRC3	NM_001165;NM_182962	0.00182978	0.0426547	0.22747	0.772419	0.544949
cg24157392	BTLA;BTLA	NM_181780;NM_001085357	0.00425642	0.048697	-0.244814	0.43187	0.676684
cg26262840	C14orf102;C14orf102	NM_017970;NM_199043	0.00231643	0.0430677	0.205718	0.832673	0.626955
cg01655008	C14orf109;C14orf109	NM_001098621;NM_015676	0.00182978	0.0426547	0.222991	0.820958	0.597967
cg25576997	C14orf34;C14orf34	NR_026796;NR_026797	0.00451305	0.048697	0.26614	0.74166	0.47552
cg15553418	C1orf144;C1orf144	NM_015609;NM_001114600	0.00291403	0.0442236	0.244993	0.704118	0.459125
cg05799811	CD247;CD247	NM_198053;NM_000734	0.00363662	0.045968	-0.251388	0.305438	0.556826
cg07786657	CD247;CD247	NM_198053;NM_000734	0.00182978	0.0426547	-0.209717	0.387273	0.59699
cg09473725	CD247;CD247	NM_198053;NM_000734	0.00111458	0.0426547	-0.235821	0.449646	0.685467
cg13623290	CDYL;CDYL	NM_004824;NR_026590	0.00111458	0.0426547	0.239535	0.830587	0.591052
cg08760493	COL25A1;COL25A1	NM_198721;NM_032518	0.00363662	0.045968	0.213221	0.690497	0.477275
cg19405329	COPS2;COPS2	NM_001143887;NM_004236	0.00291403	0.0442236	0.207374	0.777971	0.570597
cg00892703	CPNE7;CPNE7	NM_014427;NM_153636	0.00363662	0.045968	-0.225264	0.450272	0.675536
cg17896808	CYFIP1;CYFIP1	NM_014608;NM_001033028	0.00143261	0.0426547	-0.210439	0.467208	0.677647
cg10133935	DAZAP1;DAZAP1	NM_018959;NM_170711	0.00182978	0.0426547	0.228371	0.840168	0.611797
cg17591816	DNM3;DNM3	NM_015569;NM_001136127	0.00111458	0.0426547	0.235379	0.790024	0.554645
cg27591502	DOCK2;FAM196B	NM_004946;NM_001129891	0.00363662	0.045968	0.219017	0.789512	0.570495
cg15086439	EDARADD;EDARADD	NM_080738;NM_145861	0.00143261	0.0426547	0.262946	0.793193	0.530247
cg04741211	EML4;EML4	NM_001145076;NM_019063	0.00182978	0.0426547	-0.208479	0.430502	0.638981
cg14377681	ERBB2;ERBB2	NM_001005862;NM_004448	0.00291403	0.0442236	0.232598	0.700722	0.468124
cg09452568	ESM1;ESM1	NM_001135604;NM_007036	0.00231643	0.0430677	0.253302	0.726467	0.473165
cg07302959	FAM133B;FAM133B	NM_152789;NM_001040057	0.00363662	0.045968	0.288811	0.685664	0.396852
cg22957691	FEZ2;FEZ2	NM_005102;NM_001042548	0.00231643	0.0430677	0.246964	0.777404	0.53044
cg10220544	FGGY;FGGY	NM_018291;NM_001113411	0.00291403	0.0442236	0.229976	0.650528	0.420552
cg23174662	HIF1A;HIF1A	NM_001530;NM_181054	0.00182978	0.0426547	-0.251959	0.405089	0.657049
cg15535471	HIPK2;HIPK2	NM_001113239;NM_022740	0.00143261	0.0426547	-0.208173	0.547749	0.755921
cg05501357	HIPK3;HIPK3	NM_001048200;NM_005734	0.00231643	0.0430677	0.272055	0.79358	0.521525
cg25600606	HIPK3;HIPK3	NM_001048200;NM_005734	0.00111458	0.0426547	0.252411	0.85761	0.605199
cg21696012	HMGCL;HMGCL	NM_000191;NM_001166059	0.00182978	0.0426547	0.271226	0.732983	0.461756
cg11313468	HNRNPUL1;HNRNPUL1	NM_007040;NM_144732	0.00143261	0.0426547	0.289993	0.777466	0.487472
cg22840076	HNRNPUL1;HNRNPUL1	NM_007040;NM_144732	0.00182978	0.0426547	0.258514	0.793131	0.534617
cg11992736	IL12RB1;IL12RB1	NM_005535;NM_153701	0.000857939	0.0426547	-0.208334	0.206512	0.414846
cg23828301	IL5RA;IL5RA	NM_000564;NM_175726	0.000656027	0.0426547	0.215378	0.71827	0.502891
cg26776551	INTS6;INTS6	NM_012141;NM_001039937	0.00291403	0.0442236	0.229361	0.690025	0.460664
cg21792134	IQCB1;IQCB1	NM_001023570;NM_001023571	0.00291403	0.0442236	0.209316	0.871405	0.662089
cg13071069	IQSEC1;IQSEC1	NM_001134382;NM_014869	0.00291403	0.0442236	0.211694	0.667105	0.455411
cg26780042	KDELR2;KDELR2	NM_001100603;NM_006854	0.00182978	0.0426547	0.201514	0.730606	0.529092
cg25199552	KDM1A;KDM1A	NM_015013;NM_001009999	0.00291403	0.0442236	0.233944	0.770814	0.53687
cg07076751	KIAA1949;KIAA1949	NM_001134870;NM_133471	0.00291403	0.0442236	-0.239386	0.484384	0.72377
cg26184474	KIF2A;KIF2A	NM_001098511;NM_004520	0.00231643	0.0430677	0.235306	0.779652	0.544346
cg26478599	LOC285954;LOC285954	NR_027118;NR_027119	0.00363662	0.045968	0.253044	0.758584	0.50554
cg24141516	MAPKAPK2;MAPKAPK2	NM_032960;NM_004759	0.00111458	0.0426547	-0.207293	0.569946	0.777239
cg06486190	MDFIC;MDFIC	NM_199072;NM_001166345	0.00182978	0.0426547	0.262402	0.7557	0.493299
cg02505177	MGEA5;MGEA5	NM_001142434;NM_012215	0.00291403	0.0442236	-0.225163	0.365525	0.590688
cg06966839	MSI2;MSI2	NM_138962;NM_170721	0.00182978	0.0426547	0.228676	0.74257	0.513893
cg03820688	MTIF2;MTIF2	NM_002453;NM_001005369	0.00111458	0.0426547	0.276386	0.819146	0.542761
cg04460364	NDEL1;NDEL1	NM_001025579;NM_030808	0.00363662	0.045968	0.24394	0.801462	0.557522
cg04430911	OSCP1;OSCP1	NM_206837;NM_145047	0.00231643	0.0430677	0.240238	0.733187	0.492949
cg00832329	PACS2;PACS2	NM_015197;NM_001100913	0.00182978	0.0426547	0.25727	0.742324	0.485054
cg18568335	PACS2;PACS2	NM_015197;NM_001100913	0.00291403	0.0442236	0.234861	0.741505	0.506644
cg25084760	PCCA;PCCA	NM_001127692;NM_000282	0.00363662	0.045968	0.21744	0.747869	0.530429
cg00859441	PLBD2;PLBD2	NM_001159727;NM_173542	0.00182978	0.0426547	0.231719	0.788353	0.556634
cg24961795	PLCG1;PLCG1	NM_002660;NM_182811	0.00182978	0.0426547	-0.213913	0.510182	0.724096
cg01058360	PRKAG2;PRKAG2	NM_016203;NM_001040633	0.00291403	0.0442236	0.216012	0.767435	0.551423
cg17932662	PTPN7;PTPN7	NM_002832;NM_080588	0.00182978	0.0426547	0.257124	0.763149	0.506025
cg07143125	PTPRJ;PTPRJ	NM_002843;NM_001098503	0.00291403	0.0442236	0.212387	0.760883	0.548496
cg07401324	PTPRJ;PTPRJ	NM_002843;NM_001098503	0.00143261	0.0426547	0.235441	0.76899	0.533549
cg05523906	RCC2;RCC2	NM_018715;NM_001136204	0.00291403	0.0442236	0.206851	0.70387	0.497019
cg21774136	RERE;RERE	NM_012102;NM_001042681	0.00231643	0.0430677	-0.213401	0.37568	0.589081
cg08557970	RPS6KA2;RPS6KA2	NM_021135;NM_001006932	0.00291403	0.0442236	0.228886	0.726786	0.4979
cg01498832	RPTOR;RPTOR	NM_001163034;NM_020761	0.00182978	0.0426547	0.231356	0.749461	0.518105
cg02251850	RPTOR;RPTOR	NM_001163034;NM_020761	0.00291403	0.0442236	-0.280417	0.377119	0.657536
cg11153071	RPTOR;RPTOR	NM_001163034;NM_020761	0.00143261	0.0426547	0.203378	0.788958	0.58558
cg22386583	RPTOR;RPTOR	NM_001163034;NM_020761	0.000857939	0.0426547	0.224501	0.769115	0.544614
cg26360197	RPTOR;RPTOR	NM_001163034;NM_020761	0.00363662	0.045968	-0.235053	0.386337	0.621391
cg03961551	RUNX3;RUNX3	NM_001031680;NM_004350	0.00363662	0.045968	-0.260535	0.343649	0.604185
cg08973191	SCRIB;SCRIB	NM_015356;NM_182706	0.00111458	0.0426547	0.235388	0.841463	0.606075
cg18854872	SF3B1;SF3B1	NM_001005526;NM_012433	0.00231643	0.0430677	0.222736	0.750014	0.527278
cg17222829	SHANK2;SHANK2	NM_012309;NM_133266	0.00143261	0.0426547	0.211666	0.661639	0.449973
cg04450994	SLC22A23;SLC22A23	NM_021945;NM_015482	0.00363662	0.045968	-0.239301	0.308745	0.548046
cg18446110	SLC23A1;SLC23A1	NM_152685;NM_005847	0.00291403	0.0442236	0.231648	0.700976	0.469328
cg13410614	SLC2A6;SLC2A6	NM_001145099;NM_017585	0.00231643	0.0430677	0.215917	0.639884	0.423967
cg11125805	SLC36A3;SLC36A3	NM_001145017;NM_181774	0.00182978	0.0426547	0.23578	0.683925	0.448145
cg14086364	SLC36A3;SLC36A3	NM_001145017;NM_181774	0.00231643	0.0430677	0.242195	0.745873	0.503678
cg01012242	SLC37A3;SLC37A3	NM_207113;NM_032295	0.00231643	0.0430677	0.200152	0.661959	0.461807
cg05919238	SLC38A10;SLC38A10	NM_001037984;NM_138570	0.00143261	0.0426547	0.203958	0.828988	0.625029
cg26847100	SLC44A2;SLC44A2	NM_001145056;NM_020428	0.00451305	0.048697	0.226304	0.67529	0.448986
cg26508200	SSH1;SSH1	NM_001161330;NM_018984	0.00231643	0.0430677	0.237381	0.802511	0.565131
cg18805457	TCERG1;TCERG1	NM_006706;NM_001040006	0.00363662	0.045968	0.243303	0.726122	0.48282
cg16489809	TCTN3;TCTN3	NM_015631;NM_001143973	0.000656027	0.0426547	0.231888	0.807049	0.57516
cg17359629	TFDP1;TFDP1	NR_026580;NM_007111	0.00111458	0.0426547	0.22262	0.778785	0.556165
cg07613391	TGFBR2;TGFBR2	NM_001024847;NM_003242	0.00231643	0.0430677	-0.257802	0.408506	0.666309
cg01950511	TRAF3IP1;TRAF3IP1	NM_015650;NM_001139490	0.00363662	0.045968	0.204597	0.676741	0.472144
cg03094134	TRIM39;TRIM39	NM_172016;NM_021253	0.00363662	0.045968	0.217142	0.782465	0.565323
cg04425551	TRIM39;TRIM39	NM_172016;NM_021253	0.00291403	0.0442236	0.210828	0.796129	0.585301
cg07905808	TRIM39;TRIM39	NM_172016;NM_021253	0.00231643	0.0430677	0.200218	0.84552	0.645303
cg11327408	TRIM39;TRIM39	NM_172016;NM_021253	0.00363662	0.045968	0.204622	0.810093	0.605471
cg17080697	TRIM39;TRIM39	NM_172016;NM_021253	0.00143261	0.0426547	0.228304	0.838075	0.609771
cg21426759	TRIM39;TRIM39	NM_172016;NM_021253	0.00182978	0.0426547	0.255776	0.817472	0.561696
cg25952192	TTC39C;TTC39C	NM_001135993;NM_153211	0.00425642	0.048697	-0.219475	0.381142	0.600617
cg09354050	UBASH3A;UBASH3A	NM_018961;NM_001001895	0.00363662	0.045968	-0.227773	0.448423	0.676196
cg19513582	UBE2H;UBE2H	NM_003344;NM_182697	0.00111458	0.0426547	0.204571	0.834452	0.629882
cg10859442	UCP3;UCP3	NM_022803;NM_003356	0.00451305	0.048697	-0.251053	0.456123	0.707175
cg16624482	UMODL1;UMODL1	NM_173568;NM_001004416	0.00363662	0.045968	0.219931	0.749056	0.529125
cg07734159	VCL;VCL	NM_003373;NM_014000	0.00363662	0.045968	0.206096	0.831286	0.62519
cg00691123	VGLL4;VGLL4	NM_014667;NM_001128219	0.00363662	0.045968	0.248291	0.771618	0.523327
cg04943741	VPS28;VPS28	NM_016208;NM_183057	0.00182978	0.0426547	0.225756	0.821737	0.595981
cg13589463	WDR25;WDR25	NM_024515;NM_001161476	0.00111458	0.0426547	0.239692	0.841174	0.601482
cg05454562	WDR46;WDR46	NM_005452;NM_001164267	0.00291403	0.0442236	0.268109	0.790671	0.522562
cg07631435	ZBTB16;ZBTB16	NM_006006;NM_001018011	0.00182978	0.0426547	-0.217282	0.296484	0.513766
cg06857116	ZSWIM7;ZSWIM7	NM_001042698;NM_001042697	0.00291403	0.0442236	0.202199	0.735204	0.533005
cg03308839	NDE1;NDE1;MYH11;MYH11;MYH11;MYH11	NM_017668;NM_001143979;NM_001040114;NM_022844;NM_001040113;NM_002474	0.00363662	0.045968	0.24658	0.718039	0.471459
cg15930380	MIER1;MIER1;MIER1;MIER1;MIER1;MIER1;MIER1;MIER1;MIER1;MIER1	NM_001077704;NM_001146111;NM_001146113;NM_001077703;NM_001146112;NM_001077700;NM_001146110;NM_001077702;NM_001077701;NM_020948	0.000201172	0.0426547	-0.211533	0.23404	0.445573
cg17679427	CREM;CREM;CREM;CREM;CREM;CREM;CREM;CREM;CREM;CREM;CREM	NM_182769;NM_182770;NM_182853;NM_183011;NM_183013;NM_182772;NM_183060;NM_181571;NM_182850;NM_183012;NM_182771	0.00231643	0.0430677	0.216077	0.648681	0.432604
cg14249174	ARFIP1;ARFIP1;ARFIP1	NM_014447;NM_001025595;NM_001025593	0.000656027	0.0426547	0.23448	0.847247	0.612768
cg03998264	ATF7;ATF7;ATF7	NM_006856;NM_001130060;NM_001130059	0.00143261	0.0426547	0.244235	0.70269	0.458455
cg17158941	C7orf50;C7orf50;C7orf50	NM_001134395;NM_032350;NM_001134396	0.00291403	0.0442236	-0.207793	0.536865	0.744658
cg18502618	COL18A1;COL18A1;COL18A1	NM_130444;NM_030582;NM_130445	0.00143261	0.0426547	0.207391	0.848441	0.64105
cg04205769	DPH5;DPH5;DPH5	NM_001077395;NM_015958;NM_001077394	0.00363662	0.045968	0.232501	0.773728	0.541227
cg25068347	ETS1;ETS1;ETS1	NM_001143820;NM_001162422;NM_005238	0.00451305	0.048697	-0.200529	0.516827	0.717356
cg10447327	LANCL1;LANCL1;LANCL1	NM_001136574;NM_006055;NM_001136575	0.00291403	0.0442236	0.264971	0.733078	0.468107
cg06739107	LPP;LPP;LPP	NM_005578;NM_001167671;NM_001167672	0.00451305	0.048697	0.251872	0.762314	0.510442
cg25853622	LPP;LPP;LPP	NM_005578;NM_001167671;NM_001167672	0.00182978	0.0426547	0.202475	0.652048	0.449572
cg02185182	MAD1L1;MAD1L1;MAD1L1	NM_003550;NM_001013837;NM_001013836	0.00182978	0.0426547	0.230725	0.732333	0.501607
cg12376829	MAD1L1;MAD1L1;MAD1L1	NM_003550;NM_001013837;NM_001013836	0.000656027	0.0426547	0.201114	0.858958	0.657844
cg18542546	MAD1L1;MAD1L1;MAD1L1	NM_003550;NM_001013837;NM_001013836	0.00451305	0.048697	0.23823	0.785398	0.547167
cg06257110	METTL9;IGSF6;METTL9	NM_001077180;NM_005849;NM_016025	0.00451305	0.048697	-0.249682	0.464522	0.714204
cg07698102	PARD3B;PARD3B;PARD3B	NM_152526;NM_057177;NM_205863	0.000656027	0.0426547	-0.204717	0.389251	0.593969
cg18659081	PARVG;PARVG;PARVG	NM_001137606;NM_001137605;NM_022141	0.00231643	0.0430677	0.241526	0.735007	0.49348
cg09485853	PKM2;PKM2;PKM2	NM_002654;NM_182471;NM_182470	0.000857939	0.0426547	0.203945	0.702661	0.498716
cg27340480	PLAUR;PLAUR;PLAUR	NM_002659;NM_001005376;NM_001005377	0.00451305	0.048697	0.274184	0.744462	0.470278
cg16652347	PLXNA4;PLXNA4;PLXNA4	NM_001105543;NM_181775;NM_020911	0.00231643	0.0430677	-0.230478	0.40563	0.636108
cg06727242	RAD51L1;RAD51L1;RAD51L1	NM_133509;NM_002877;NM_133510	0.00143261	0.0426547	0.209905	0.618911	0.409006
cg18825221	RAD51L1;RAD51L1;RAD51L1	NM_133509;NM_002877;NM_133510	0.00291403	0.0442236	-0.22558	0.217667	0.443247
cg13353550	RAPGEF3;RAPGEF3;RAPGEF3	NM_001098532;NM_006105;NM_001098531	0.00231643	0.0430677	0.201408	0.761928	0.56052
cg23815853	RAPGEF3;RAPGEF3;RAPGEF3	NM_001098532;NM_006105;NM_001098531	0.00291403	0.0442236	0.242482	0.783471	0.540989
cg04831327	RBM19;RBM19;RBM19	NM_001146698;NM_001146699;NM_016196	0.00291403	0.0442236	0.211513	0.782965	0.571453
cg00670915	RPL31;RPL31;RPL31	NM_001099693;NM_001098577;NM_000993	0.00291403	0.0442236	0.21631	0.727498	0.511188
cg11691844	SYTL2;SYTL2;SYTL2	NM_001162951;NM_001162953;NM_032943	0.00231643	0.0430677	0.215627	0.739124	0.523497
cg10825315	TSHR;TSHR;TSHR	NM_001018036;NM_001142626;NM_000369	0.00111458	0.0426547	-0.250104	0.163821	0.413925
cg13525276	TSHR;TSHR;TSHR	NM_001018036;NM_001142626;NM_000369	0.000144222	0.0426547	-0.208703	0.145899	0.354602
cg14373410	TSHR;TSHR;TSHR	NM_001018036;NM_001142626;NM_000369	0.00182978	0.0426547	-0.238705	0.542629	0.781335
cg14345154	TTC8;TTC8;TTC8	NM_198309;NM_144596;NM_198310	0.00231643	0.0430677	0.209979	0.836424	0.626446
cg21876656	UBAC2;UBAC2;UBAC2	NM_001144072;NM_177967;NR_026644	0.00291403	0.0442236	-0.232881	0.438435	0.671316
cg04350202	XPNPEP1;XPNPEP1;XPNPEP1	NR_030724;NM_020383;NM_001167604	0.00363662	0.045968	0.200432	0.766183	0.565751
cg27170268	XRCC3;XRCC3;XRCC3	NM_001100119;NM_005432;NM_001100118	0.00291403	0.0442236	0.2228	0.664703	0.441903
cg21163444	ZNF385A;ZNF385A;ZNF385A	NM_001130968;NM_001130967;NM_015481	0.00451305	0.048697	0.201757	0.684783	0.483026
cg11054816	BACE1;BACE1;BACE1;BACE1	NM_138972;NM_138971;NM_138973;NM_012104	0.000857939	0.0426547	0.254089	0.736167	0.482078
cg19460836	BAIAP2;BAIAP2;BAIAP2;BAIAP2	NM_017450;NM_006340;NM_001144888;NM_017451	0.00231643	0.0430677	0.248412	0.814091	0.565679
cg25043129	BAIAP2;BAIAP2;BAIAP2;BAIAP2	NM_017450;NM_006340;NM_001144888;NM_017451	0.00182978	0.0426547	0.225839	0.783423	0.557583
cg14511782	GPR85;GPR85;GPR85;GPR85	NM_018970;NM_001146267;NM_001146266;NM_001146265	0.00111458	0.0426547	0.247279	0.667114	0.419834
cg04747180	KLHL5;KLHL5;KLHL5;KLHL5	NM_015990;NM_199039;NM_001007075;NM_001171654	0.00231643	0.0430677	0.25965	0.751607	0.491957
cg16145324	MAPK14;MAPK14;MAPK14;MAPK14	NM_139014;NM_139013;NM_139012;NM_001315	0.00363662	0.045968	0.232039	0.796114	0.564075
cg27193519	MGRN1;MGRN1;MGRN1;MGRN1	NM_015246;NM_001142291;NM_001142290;NM_001142289	0.00143261	0.0426547	0.205438	0.61003	0.404592
cg09284275	MYH11;MYH11;MYH11;MYH11	NM_022844;NM_002474;NM_001040114;NM_001040113	0.00363662	0.045968	0.22865	0.700101	0.47145
cg22324981	NFATC1;NFATC1;NFATC1;NFATC1	NM_006162;NM_172388;NM_172389;NM_172387	0.00182978	0.0426547	-0.224496	0.406683	0.631179
cg24690314	PHACTR2;PHACTR2;PHACTR2;PHACTR2	NM_001100164;NM_001100166;NM_014721;NM_001100165	0.000656027	0.0426547	0.220689	0.821544	0.600854
cg22694271	PSRC1;PSRC1;PSRC1;PSRC1	NM_032636;NM_001032291;NM_001005290;NM_001032290	0.00291403	0.0442236	0.217284	0.681603	0.464319
cg14054883	SYK;SYK;SYK;SYK	NR_024155;NR_024156;NM_003177;NM_001135052	0.00231643	0.0430677	-0.239108	0.479629	0.718737
cg04858164	TCF12;TCF12;TCF12;TCF12	NM_003205;NM_207037;NM_207036;NM_207038	0.000656027	0.0426547	0.229722	0.876416	0.646695
cg22941573	TMEM189;TMEM189-UBE2V1;TMEM189;TMEM189	NM_001162505;NM_199203;NR_027889;NM_199129	0.00231643	0.0430677	0.208917	0.78674	0.577823
cg01332683	ABCC1;ABCC1;ABCC1;ABCC1;ABCC1	NM_019862;NM_019898;NM_019899;NM_004996;NM_019900	0.00363662	0.045968	0.205802	0.652471	0.446669
cg16502747	ACIN1;ACIN1;ACIN1;ACIN1;ACIN1	NM_001164817;NM_001164815;NM_014977;NM_001164816;NM_001164814	0.00182978	0.0426547	0.232001	0.692341	0.46034
cg05057534	BRE;BRE;BRE;BRE;BRE	NM_199192;NM_199193;NM_199191;NM_004899;NM_199194	0.00363662	0.045968	0.21159	0.724585	0.512995
cg02227879	CAMK2G;CAMK2G;CAMK2G;CAMK2G;CAMK2G	NM_172173;NM_172169;NM_172170;NM_001222;NM_172171	0.00451305	0.048697	0.210998	0.725214	0.514216
cg06465076	CAST;CAST;CAST;CAST;CAST	NM_001750;NM_001042441;NM_173063;NM_001042440;NM_001042442	0.00143261	0.0426547	0.248023	0.836801	0.588778
cg08688659	CD44;CD44;CD44;CD44;CD44	NM_001001389;NM_001001392;NM_000610;NM_001001390;NM_001001391	0.00451305	0.048697	0.219118	0.755216	0.536098
cg23189692	EIF4G1;EIF4G1;EIF4G1;EIF4G1;EIF4G1	NM_198241;NM_182917;NM_198242;NM_198244;NM_004953	0.00451305	0.048697	0.258051	0.715464	0.457413
cg06748146	HK1;HK1;HK1;HK1;HK1	NM_033500;NM_000188;NM_033498;NM_033497;NM_033496	0.00363662	0.045968	-0.21108	0.396201	0.60728
cg01440934	MKNK1;MKNK1;MKNK1;MKNK1;MKNK1	NR_024174;NM_003684;NR_024176;NM_001135553;NM_198973	0.00363662	0.045968	0.235863	0.759781	0.523918
cg23745290	PPA2;PPA2;PPA2;PPA2;PPA2	NM_006903;NM_176867;NM_001034191;NM_176869;NM_176866	0.00182978	0.0426547	0.23702	0.793712	0.556692
cg17904575	PPP2R5C;PPP2R5C;PPP2R5C;PPP2R5C;PPP2R5C	NM_001161726;NM_002719;NM_001161725;NM_178587;NM_178586	0.00363662	0.045968	-0.243282	0.389388	0.632669
cg13255542	THYN1;THYN1;THYN1;THYN1;THYN1	NM_199298;NM_001037304;NM_014174;NM_001037305;NM_199297	0.00363662	0.045968	0.249175	0.778342	0.529168
cg19389293	C18orf1;C18orf1;C18orf1;C18orf1;C18orf1;C18orf1	NM_001003675;NM_181481;NM_181482;NM_004338;NM_001003674;NM_181483	0.00037128	0.0426547	0.216509	0.578474	0.361964
cg25140190	C18orf1;C18orf1;C18orf1;C18orf1;C18orf1;C18orf1	NM_001003675;NM_181481;NM_181482;NM_004338;NM_001003674;NM_181483	0.00451305	0.048697	0.211577	0.685309	0.473732
cg08441850	IKZF3;IKZF3;IKZF3;IKZF3;IKZF3;IKZF3	NM_183228;NM_183229;NM_012481;NM_183230;NM_183231;NM_183232	0.00291403	0.0442236	-0.242868	0.384944	0.627811
cg26192520	YWHAZ;YWHAZ;YWHAZ;YWHAZ;YWHAZ;YWHAZ	NM_001135700;NM_001135702;NM_145690;NM_003406;NM_001135699;NM_001135701	0.00291403	0.0442236	-0.224942	0.461076	0.686018
cg02291010	CAST;CAST;CAST;CAST;CAST;CAST;CAST;CAST;CAST;CAST;CAST	NM_001750;NM_001042441;NM_173060;NM_001042444;NM_001042445;NM_001042442;NM_173061;NM_001042446;NM_173063;NM_001042440;NM_001042443	0.00363662	0.045968	0.20348	0.813409	0.609928
cg25006077	MBNL1;MBNL1;MBNL1;MBNL1;MBNL1;MBNL1;MBNL1	NM_207295;NM_207293;NM_021038;NM_207292;NM_207296;NM_207297;NM_207294	0.000857939	0.0426547	0.256291	0.84223	0.585939
cg17791799	PROM1;PROM1;PROM1;PROM1;PROM1;PROM1;PROM1	NM_001145848;NM_001145850;NM_001145852;NM_001145849;NM_001145847;NM_006017;NM_001145851	0.00363662	0.045968	0.228142	0.816941	0.588799
cg08185095	STAU2;STAU2;STAU2;STAU2;STAU2;STAU2;STAU2	NM_001164380;NM_001164381;NM_014393;NM_001164382;NM_001164385;NM_001164384;NM_001164383	0.00451305	0.048697	0.202842	0.780459	0.577616
cg02331830	PLEC1;PLEC1;PLEC1;PLEC1;PLEC1;PLEC1;PLEC1;PLEC1	NM_201378;NM_201384;NM_201382;NM_201381;NM_000445;NM_201380;NM_201383;NM_201379	0.00143261	0.0426547	-0.205087	0.248853	0.45394
cg07427475	PLEC1;PLEC1;PLEC1;PLEC1;PLEC1;PLEC1;PLEC1;PLEC1	NM_201378;NM_201384;NM_201382;NM_201381;NM_000445;NM_201380;NM_201383;NM_201379	0.00182978	0.0426547	-0.264746	0.37023	0.634976
cg10202975	CAST;CAST;CAST;CAST;CAST;CAST;CAST;CAST;CAST;CAST	NM_001750;NM_001042441;NM_173060;NM_001042444;NM_001042445;NM_001042442;NM_001042446;NM_173063;NM_001042440;NM_001042443	0.000656027	0.0426547	0.205873	0.663844	0.457971
cg16728539	CACNA1C;CACNA1C;CACNA1C;CACNA1C;CACNA1C;CACNA1C;CACNA1C;CACNA1C;CACNA1C;CACNA1C;CACNA1C;CACNA1C;CACNA1C;CACNA1C;CACNA1C;CACNA1C;CACNA1C;CACNA1C;CACNA1C;CACNA1C;CACNA1C;CACNA1C;CACNA1C	NM_001129844;NM_001129827;NM_001129839;NM_001129834;NM_001129841;NM_000719;NM_001129830;NM_001167625;NM_001129843;NM_001167624;NM_001129835;NM_001129837;NM_001167623;NM_001129840;NM_199460;NM_001129833;NM_001129832;NM_001129829;NM_001129846;NM_001129836;NM_001129838;NM_001129831;NM_001129842	0.00451305	0.048697	0.20447	0.696458	0.491987
cg13509702	SCRIB;SCRIB;MIR937	NM_015356;NM_182706;NR_030633	0.00111458	0.0426547	0.22504	0.712049	0.487009
cg01241390	RNU5E;RNU5D;ZCCHC9;ZCCHC9;ZCCHC9	NR_002754;NR_002755;NM_032280;NM_001131036;NM_001131035	0.00363662	0.045968	0.264348	0.746018	0.48167
cg06654079	DNAH3;TMEM159	NM_017539;NM_020422	0.00291403	0.0442236	0.242868	0.67767	0.434802
cg07079231	DNAH3;TMEM159	NM_017539;NM_020422	0.00231643	0.0430677	0.230614	0.843909	0.613294
cg25656283	ERCC6;PGBD3	NM_000124;NM_170753	0.00111458	0.0426547	0.208023	0.826715	0.618692
cg01586609	HTR3A;HTR3A;HTR3A	NM_000869;NM_001161772;NM_213621	0.00143261	0.0426547	0.233506	0.756505	0.522999
cg05942508	HTR3A;HTR3A;HTR3A	NM_000869;NM_001161772;NM_213621	0.00111458	0.0426547	0.207663	0.465188	0.257525
cg10953410	HTR3A;HTR3A;HTR3A	NM_000869;NM_001161772;NM_213621	0.000201172	0.0426547	0.244386	0.788864	0.544478
cg10838410	IFFO1;IFFO1;IFFO1	NM_080730;NM_080731;NM_001039670	0.00363662	0.045968	0.200471	0.577377	0.376906
cg13549277	IFFO1;IFFO1;IFFO1	NM_080730;NM_080731;NM_001039670	0.00143261	0.0426547	0.221047	0.714039	0.492992
cg04256697	PXN;PXN;PXN	NM_001080855;NM_025157;NM_002859	0.00143261	0.0426547	-0.222424	0.412617	0.63504
cg02035751	RASSF5;RASSF5;RASSF5	NM_182663;NM_182665;NM_182664	0.00182978	0.0426547	-0.205564	0.447997	0.653561
cg05756492	RASSF5;RASSF5;RASSF5	NM_182663;NM_182665;NM_182664	0.00363662	0.045968	-0.212932	0.437616	0.650548
cg19342782	HHLA3;ANKRD13C;HHLA3;HHLA3;HHLA3	NM_001036646;NM_030816;NR_027404;NM_001031693;NM_001036645	0.00291403	0.0442236	0.244723	0.736003	0.49128
cg16678522	CBFA2T2;CBFA2T2;CBFA2T2	NM_001032999;NM_001039709;NM_005093	0.00182978	0.0426547	0.207811	0.815713	0.607902
cg08742502	PRDM1;PRDM1	NM_001198;NM_182907	0.00451305	0.048697	-0.224408	0.422158	0.646566
cg09408143	RAB11FIP3;RAB11FIP3	NM_014700;NM_001142272	0.00363662	0.045968	0.211003	0.691371	0.480368
cg21005412	WDR43;SNORD53	NM_015131;NR_002741	0.00182978	0.0426547	0.246199	0.822014	0.575815
cg24738611	WDR43;SNORD53	NM_015131;NR_002741	0.00143261	0.0426547	0.254748	0.690921	0.436173
cg21440776	IFFO1;IFFO1;IFFO1	NM_080730;NM_080731;NM_001039670	0.00291403	0.0442236	0.218886	0.70658	0.487694
cg14685356	SYNE1;SYNE1;SYNE1	NM_182961;NM_015293;NM_033071	0.00363662	0.045968	0.227779	0.658444	0.430665
cg00010672	NA	NA	0.00451305	0.048697	-0.232705	0.555041	0.787746
cg00179026	NA	NA	0.000857939	0.0426547	-0.209595	0.519311	0.728906
cg00221794	NA	NA	0.00182978	0.0426547	-0.212073	0.351864	0.563937
cg00446046	NA	NA	0.00143261	0.0426547	0.202492	0.797708	0.595216
cg00578614	NA	NA	0.00111458	0.0426547	0.22379	0.721994	0.498204
cg00637104	NA	NA	0.00363662	0.045968	0.214002	0.786733	0.572731
cg00660167	NA	NA	0.00291403	0.0442236	0.271041	0.810938	0.539897
cg00720159	NA	NA	0.00363662	0.045968	0.230985	0.783573	0.552588
cg00777445	NA	NA	0.00231643	0.0430677	0.252366	0.8124	0.560034
cg00980622	NA	NA	0.00231643	0.0430677	0.249043	0.796808	0.547765
cg01003666	NA	NA	0.00451305	0.048697	-0.212599	0.344794	0.557393
cg01023672	NA	NA	0.00231643	0.0430677	0.232181	0.751671	0.51949
cg01200021	NA	NA	0.00143261	0.0426547	-0.20119	0.46099	0.66218
cg01283625	NA	NA	0.00363662	0.045968	0.224137	0.780062	0.555924
cg01526217	NA	NA	0.00182978	0.0426547	0.232219	0.685672	0.453453
cg01556552	NA	NA	0.00111458	0.0426547	0.246418	0.79038	0.543962
cg01558916	NA	NA	0.00231643	0.0430677	0.223068	0.687464	0.464396
cg01715248	NA	NA	0.00451305	0.048697	0.223854	0.716372	0.492517
cg01723892	NA	NA	0.00363662	0.045968	0.229839	0.67469	0.444851
cg01772743	NA	NA	0.00291403	0.0442236	-0.233122	0.434232	0.667354
cg01785706	NA	NA	0.00111458	0.0426547	-0.229579	0.444967	0.674546
cg01822050	NA	NA	0.00111458	0.0426547	0.259914	0.823223	0.563309
cg01849093	NA	NA	0.00231643	0.0430677	-0.204505	0.451204	0.655709
cg01861537	NA	NA	0.00363662	0.045968	0.243071	0.784988	0.541917
cg01867764	NA	NA	0.00231643	0.0430677	-0.211962	0.426283	0.638245
cg01973456	NA	NA	0.00182978	0.0426547	0.221474	0.562589	0.341115
cg02262553	NA	NA	0.00363662	0.045968	0.202726	0.645537	0.442811
cg02279108	NA	NA	0.00291403	0.0442236	0.207885	0.694892	0.487007
cg02315513	NA	NA	0.00451305	0.048697	-0.230557	0.459077	0.689634
cg02399831	NA	NA	0.00363662	0.045968	0.241528	0.774609	0.53308
cg02551745	NA	NA	0.00291403	0.0442236	0.223958	0.650807	0.426849
cg02646515	NA	NA	0.000495534	0.0426547	-0.20533	0.390255	0.595585
cg02806156	NA	NA	0.00291403	0.0442236	0.230522	0.783423	0.552901
cg02922776	NA	NA	0.00231643	0.0430677	0.20389	0.591037	0.387147
cg03035162	NA	NA	0.00182978	0.0426547	-0.202942	0.501959	0.704901
cg03040292	NA	NA	0.00291403	0.0442236	-0.218053	0.453624	0.671678
cg03072035	NA	NA	0.00451305	0.048697	0.201773	0.728245	0.526473
cg03604774	NA	NA	0.00451305	0.048697	-0.216629	0.456607	0.673237
cg03728799	NA	NA	0.00451305	0.048697	-0.24073	0.406532	0.647263
cg03957124	NA	NA	0.00363662	0.045968	-0.209381	0.372223	0.581605
cg04011995	NA	NA	0.00231643	0.0430677	0.206744	0.831337	0.624593
cg04051365	NA	NA	0.000656027	0.0426547	0.22294	0.679807	0.456867
cg04071967	NA	NA	0.00291403	0.0442236	0.227047	0.669349	0.442302
cg04088945	NA	NA	0.00231643	0.0430677	0.230048	0.779147	0.549099
cg04100124	NA	NA	0.00451305	0.048697	0.228584	0.694883	0.466299
cg04174091	NA	NA	0.000656027	0.0426547	-0.218915	0.372172	0.591087
cg04231085	NA	NA	0.00182978	0.0426547	0.213264	0.732817	0.519553
cg04252203	NA	NA	0.00291403	0.0442236	0.233587	0.738603	0.505015
cg04280772	NA	NA	0.00143261	0.0426547	-0.222049	0.517872	0.73992
cg04386400	NA	NA	0.000857939	0.0426547	0.212165	0.764206	0.552041
cg04484126	NA	NA	0.00143261	0.0426547	0.248513	0.735334	0.486821
cg04552418	NA	NA	0.00363662	0.045968	0.242821	0.763849	0.521028
cg04605532	NA	NA	0.00231643	0.0430677	0.219711	0.792176	0.572465
cg04640972	NA	NA	0.00111458	0.0426547	-0.207729	0.380666	0.588395
cg04871472	NA	NA	0.00451305	0.048697	0.230426	0.716984	0.486559
cg05021029	NA	NA	0.00291403	0.0442236	-0.215642	0.534746	0.750388
cg05061769	NA	NA	0.000495534	0.0426547	0.214948	0.731265	0.516317
cg05162858	NA	NA	0.00182978	0.0426547	0.248292	0.60757	0.359278
cg05270224	NA	NA	0.000857939	0.0426547	-0.233635	0.317732	0.551367
cg05310486	NA	NA	0.00363662	0.045968	0.227137	0.782079	0.554942
cg05372753	NA	NA	0.00451305	0.048697	0.205611	0.787728	0.582118
cg05453411	NA	NA	0.00231643	0.0430677	0.214929	0.601908	0.386979
cg05705140	NA	NA	0.00231643	0.0430677	-0.216756	0.508355	0.725111
cg05830425	NA	NA	0.00291403	0.0442236	0.216116	0.81549	0.599374
cg05969360	NA	NA	0.000656027	0.0426547	-0.209696	0.559309	0.769005
cg06168950	NA	NA	0.00231643	0.0430677	0.204522	0.825542	0.62102
cg06257058	NA	NA	0.00231643	0.0430677	0.223371	0.708397	0.485026
cg06634140	NA	NA	0.00182978	0.0426547	0.224903	0.798618	0.573715
cg06640997	NA	NA	0.00111458	0.0426547	-0.233557	0.506539	0.740096
cg06655216	NA	NA	0.00231643	0.0430677	-0.246096	0.457133	0.703229
cg06706156	NA	NA	0.00231643	0.0430677	0.233586	0.751013	0.517427
cg06851151	NA	NA	0.00291403	0.0442236	-0.21002	0.392725	0.602745
cg06867089	NA	NA	0.00143261	0.0426547	0.212722	0.785066	0.572344
cg06885823	NA	NA	0.00182978	0.0426547	0.239966	0.753783	0.513817
cg06917763	NA	NA	0.00451305	0.048697	0.206287	0.717144	0.510857
cg07143462	NA	NA	0.00143261	0.0426547	0.240982	0.802371	0.561389
cg07427438	NA	NA	0.00182978	0.0426547	0.202667	0.742023	0.539356
cg07453440	NA	NA	0.000857939	0.0426547	0.21235	0.54766	0.335309
cg07468327	NA	NA	0.00291403	0.0442236	0.211287	0.830637	0.61935
cg07493197	NA	NA	0.00291403	0.0442236	0.218004	0.600218	0.382214
cg07586235	NA	NA	0.00291403	0.0442236	0.233069	0.746918	0.513849
cg07586956	NA	NA	0.00231643	0.0430677	-0.248744	0.506338	0.755082
cg07706695	NA	NA	0.00182978	0.0426547	-0.27545	0.308576	0.584026
cg08091050	NA	NA	0.00231643	0.0430677	0.24882	0.806946	0.558126
cg08160072	NA	NA	0.00182978	0.0426547	0.213604	0.755351	0.541747
cg08398132	NA	NA	0.00363662	0.045968	0.207649	0.817765	0.610116
cg08624648	NA	NA	0.000656027	0.0426547	0.206515	0.58875	0.382236
cg08773226	NA	NA	0.00291403	0.0442236	0.201801	0.78297	0.581169
cg08792272	NA	NA	0.00363662	0.045968	-0.213106	0.464966	0.678071
cg08843850	NA	NA	0.00111458	0.0426547	0.216143	0.698468	0.482325
cg08858998	NA	NA	0.00231643	0.0430677	0.200701	0.727051	0.526349
cg09010699	NA	NA	0.00182978	0.0426547	0.254787	0.794262	0.539475
cg09101941	NA	NA	0.00291403	0.0442236	0.228241	0.597691	0.369449
cg09221159	NA	NA	0.00182978	0.0426547	-0.274283	0.30329	0.577573
cg09234252	NA	NA	0.00111458	0.0426547	-0.215984	0.468905	0.684888
cg09447675	NA	NA	0.00231643	0.0430677	0.212645	0.766023	0.553378
cg09455342	NA	NA	0.00231643	0.0430677	0.216365	0.750824	0.534459
cg09467433	NA	NA	0.00363662	0.045968	0.220892	0.803652	0.58276
cg09501509	NA	NA	0.00291403	0.0442236	0.228432	0.759092	0.53066
cg09645818	NA	NA	0.00182978	0.0426547	-0.254968	0.526056	0.781024
cg09699830	NA	NA	0.00363662	0.045968	-0.203592	0.487667	0.691259
cg09789874	NA	NA	0.00291403	0.0442236	0.244494	0.730041	0.485547
cg09909069	NA	NA	0.00451305	0.048697	-0.223857	0.537373	0.76123
cg10145533	NA	NA	0.00291403	0.0442236	-0.304497	0.431554	0.736051
cg10318744	NA	NA	0.00291403	0.0442236	-0.247582	0.39079	0.638373
cg10502324	NA	NA	0.00182978	0.0426547	-0.236059	0.331473	0.567532
cg10690440	NA	NA	0.00182978	0.0426547	0.241785	0.700343	0.458558
cg10702418	NA	NA	0.00143261	0.0426547	0.24439	0.735085	0.490695
cg10751070	NA	NA	0.00451305	0.048697	0.209776	0.75888	0.549104
cg10800620	NA	NA	0.00231643	0.0430677	-0.260728	0.393431	0.654159
cg10826999	NA	NA	0.00111458	0.0426547	0.272066	0.764243	0.492177
cg10827754	NA	NA	0.00291403	0.0442236	0.205569	0.799344	0.593775
cg10880902	NA	NA	0.000857939	0.0426547	-0.202201	0.253505	0.455706
cg11028872	NA	NA	0.000495534	0.0426547	0.203689	0.833115	0.629425
cg11168614	NA	NA	0.00291403	0.0442236	0.256346	0.798057	0.54171
cg11180667	NA	NA	0.00143261	0.0426547	0.230196	0.71015	0.479954
cg11525409	NA	NA	0.000857939	0.0426547	0.26553	0.767868	0.502339
cg11557901	NA	NA	0.00363662	0.045968	0.265052	0.801076	0.536024
cg11596902	NA	NA	0.00143261	0.0426547	0.221097	0.76011	0.539013
cg11608958	NA	NA	0.00291403	0.0442236	0.217383	0.722256	0.504872
cg11893955	NA	NA	0.00291403	0.0442236	-0.223365	0.433589	0.656954
cg12073436	NA	NA	0.00451305	0.048697	-0.228462	0.419592	0.648054
cg12110801	NA	NA	0.00231643	0.0430677	0.226187	0.708069	0.481882
cg12136387	NA	NA	0.00143261	0.0426547	0.204311	0.668725	0.464414
cg12209946	NA	NA	0.00143261	0.0426547	0.243078	0.754629	0.511551
cg12299361	NA	NA	0.00182978	0.0426547	0.213795	0.734107	0.520311
cg12313149	NA	NA	0.00363662	0.045968	0.221005	0.79526	0.574255
cg12475879	NA	NA	0.00143261	0.0426547	0.202595	0.830694	0.628099
cg12599598	NA	NA	0.00363662	0.045968	0.216479	0.733102	0.516623
cg12602909	NA	NA	0.00111458	0.0426547	0.262716	0.689948	0.427232
cg12656896	NA	NA	0.00451305	0.048697	0.207409	0.61071	0.403301
cg12707346	NA	NA	0.00231643	0.0430677	0.206274	0.659292	0.453018
cg12711832	NA	NA	0.000656027	0.0426547	0.237127	0.647121	0.409994
cg13429095	NA	NA	0.00231643	0.0430677	-0.264453	0.269651	0.534104
cg13440692	NA	NA	0.00291403	0.0442236	-0.22266	0.438828	0.661488
cg13471188	NA	NA	0.00291403	0.0442236	0.226285	0.712142	0.485858
cg13536447	NA	NA	0.00363662	0.045968	0.243987	0.714209	0.470221
cg13573745	NA	NA	0.00291403	0.0442236	0.20023	0.579304	0.379074
cg13595556	NA	NA	0.00291403	0.0442236	0.216673	0.811435	0.594762
cg13633625	NA	NA	0.00451305	0.048697	0.258734	0.816979	0.558244
cg13831136	NA	NA	0.00143261	0.0426547	0.210428	0.717552	0.507124
cg13857354	NA	NA	0.00111458	0.0426547	0.229303	0.733089	0.503786
cg13918640	NA	NA	0.00231643	0.0430677	0.200701	0.678217	0.477517
cg13955347	NA	NA	0.00363662	0.045968	-0.234437	0.457078	0.691514
cg14138235	NA	NA	0.00291403	0.0442236	0.207109	0.711856	0.504746
cg14191024	NA	NA	0.00291403	0.0442236	0.224391	0.807556	0.583165
cg14375890	NA	NA	0.00182978	0.0426547	-0.268258	0.361291	0.629549
cg14419046	NA	NA	0.00182978	0.0426547	0.246302	0.74884	0.502538
cg14520947	NA	NA	0.00291403	0.0442236	0.235499	0.793517	0.558018
cg14523804	NA	NA	0.00143261	0.0426547	0.219822	0.868227	0.648405
cg14746387	NA	NA	0.000857939	0.0426547	0.204303	0.65	0.445697
cg14834285	NA	NA	0.00363662	0.045968	0.238624	0.704415	0.465791
cg14957089	NA	NA	0.000857939	0.0426547	-0.227917	0.469656	0.697573
cg15046489	NA	NA	0.00182978	0.0426547	-0.214099	0.558907	0.773007
cg15169266	NA	NA	0.00363662	0.045968	0.20258	0.819852	0.617272
cg15173780	NA	NA	0.00291403	0.0442236	-0.203167	0.48024	0.683407
cg15709265	NA	NA	0.00363662	0.045968	0.228206	0.76723	0.539023
cg15825027	NA	NA	0.00291403	0.0442236	0.209398	0.785937	0.576538
cg15903956	NA	NA	0.00231643	0.0430677	-0.224491	0.426252	0.650742
cg15961455	NA	NA	0.00291403	0.0442236	0.227516	0.782505	0.554988
cg15986587	NA	NA	0.00451305	0.048697	0.225791	0.780471	0.55468
cg16041412	NA	NA	0.00143261	0.0426547	0.2716	0.785347	0.513747
cg16096172	NA	NA	0.00231643	0.0430677	0.217503	0.840768	0.623265
cg16565031	NA	NA	0.00182978	0.0426547	0.205768	0.666711	0.460943
cg17007896	NA	NA	0.00182978	0.0426547	0.248626	0.697569	0.448942
cg17078883	NA	NA	0.00231643	0.0430677	0.242098	0.791736	0.549638
cg17458693	NA	NA	0.00291403	0.0442236	-0.20296	0.57241	0.77537
cg17477578	NA	NA	0.00143261	0.0426547	-0.255563	0.499954	0.755517
cg17505469	NA	NA	0.000495534	0.0426547	-0.228963	0.491498	0.720461
cg17692230	NA	NA	0.00182978	0.0426547	0.212605	0.797333	0.584728
cg17756730	NA	NA	0.00451305	0.048697	-0.231999	0.427028	0.659027
cg17846016	NA	NA	0.00363662	0.045968	0.223973	0.782844	0.558871
cg18011672	NA	NA	0.00291403	0.0442236	-0.272539	0.339082	0.611621
cg18242288	NA	NA	0.00182978	0.0426547	0.232492	0.814355	0.581863
cg18279004	NA	NA	0.000857939	0.0426547	0.222633	0.824414	0.601781
cg18424841	NA	NA	0.000274392	0.0426547	0.216397	0.8828	0.666403
cg18556976	NA	NA	0.00231643	0.0430677	0.223413	0.7105	0.487088
cg18576957	NA	NA	0.000144222	0.0426547	0.205937	0.61651	0.410574
cg18577167	NA	NA	0.00291403	0.0442236	-0.222966	0.485886	0.708852
cg18655369	NA	NA	0.00182978	0.0426547	0.219051	0.659624	0.440573
cg18802998	NA	NA	0.00231643	0.0430677	0.20263	0.683992	0.481362
cg18915856	NA	NA	0.00291403	0.0442236	0.219843	0.714455	0.494612
cg19082496	NA	NA	0.00182978	0.0426547	0.220391	0.757592	0.537201
cg19097880	NA	NA	0.00111458	0.0426547	-0.26934	0.337704	0.607043
cg19223064	NA	NA	0.00363662	0.045968	0.226633	0.708527	0.481894
cg19344545	NA	NA	0.00111458	0.0426547	-0.206382	0.445988	0.65237
cg19410609	NA	NA	0.00291403	0.0442236	0.207368	0.678124	0.470757
cg19502359	NA	NA	0.00291403	0.0442236	0.254601	0.71667	0.462069
cg19673549	NA	NA	0.00182978	0.0426547	0.210224	0.822041	0.611817
cg20012308	NA	NA	0.00363662	0.045968	0.237477	0.672544	0.435066
cg20048655	NA	NA	0.00182978	0.0426547	0.203006	0.539958	0.336952
cg20062681	NA	NA	0.00182978	0.0426547	0.219303	0.838572	0.61927
cg20107506	NA	NA	0.00143261	0.0426547	0.250536	0.821671	0.571135
cg20141108	NA	NA	0.00291403	0.0442236	0.223426	0.786499	0.563073
cg20222562	NA	NA	0.00363662	0.045968	0.241711	0.719028	0.477318
cg20491695	NA	NA	0.00231643	0.0430677	-0.202556	0.469224	0.67178
cg20627754	NA	NA	0.00291403	0.0442236	0.203547	0.728672	0.525125
cg20686403	NA	NA	0.00291403	0.0442236	0.20608	0.674511	0.468432
cg20788020	NA	NA	0.00231643	0.0430677	-0.204958	0.481727	0.686685
cg20934416	NA	NA	0.00182978	0.0426547	0.221697	0.803389	0.581692
cg20954870	NA	NA	0.00231643	0.0430677	0.250739	0.75535	0.504611
cg20956594	NA	NA	0.00363662	0.045968	0.220301	0.745375	0.525074
cg21170682	NA	NA	0.00291403	0.0442236	0.262201	0.729155	0.466954
cg21221767	NA	NA	0.00291403	0.0442236	-0.227131	0.212634	0.439765
cg21359303	NA	NA	0.00451305	0.048697	-0.274099	0.44592	0.720019
cg21579539	NA	NA	0.00363662	0.045968	0.200448	0.830285	0.629837
cg21814550	NA	NA	0.00111458	0.0426547	0.245109	0.771987	0.526877
cg22481695	NA	NA	0.000656027	0.0426547	0.251639	0.824573	0.572933
cg22489510	NA	NA	0.00291403	0.0442236	0.21192	0.708011	0.496091
cg22623649	NA	NA	0.000656027	0.0426547	0.289139	0.805925	0.516786
cg22700246	NA	NA	0.00182978	0.0426547	-0.212449	0.389357	0.601806
cg23271915	NA	NA	0.00182978	0.0426547	-0.278038	0.418028	0.696066
cg23318020	NA	NA	0.00451305	0.048697	-0.203755	0.579198	0.782952
cg23338668	NA	NA	0.00291403	0.0442236	0.225409	0.811687	0.586278
cg23428738	NA	NA	0.00291403	0.0442236	0.204199	0.804696	0.600497
cg23489236	NA	NA	0.00291403	0.0442236	-0.216751	0.558809	0.77556
cg23599224	NA	NA	0.000857939	0.0426547	0.248722	0.832307	0.583585
cg23648239	NA	NA	0.00291403	0.0442236	0.231327	0.764193	0.532866
cg23670055	NA	NA	0.00182978	0.0426547	-0.202231	0.423996	0.626227
cg23772226	NA	NA	0.00451305	0.048697	0.222769	0.708232	0.485463
cg23911433	NA	NA	0.00231643	0.0430677	0.216995	0.823524	0.606529
cg24025721	NA	NA	0.00291403	0.0442236	0.208623	0.762451	0.553828
cg24361586	NA	NA	0.00143261	0.0426547	0.233133	0.818476	0.585343
cg24405567	NA	NA	0.00291403	0.0442236	0.224623	0.690795	0.466172
cg24504014	NA	NA	0.00291403	0.0442236	0.213975	0.79634	0.582364
cg24504349	NA	NA	0.00363662	0.045968	0.253255	0.744118	0.490863
cg24520862	NA	NA	0.00451305	0.048697	-0.246808	0.310094	0.556902
cg24527636	NA	NA	0.00363662	0.045968	-0.208958	0.503581	0.712539
cg24561419	NA	NA	0.00111458	0.0426547	0.208085	0.711073	0.502988
cg24686551	NA	NA	0.00291403	0.0442236	0.216167	0.649149	0.432982
cg24722198	NA	NA	0.00143261	0.0426547	-0.215544	0.490635	0.706179
cg24737761	NA	NA	0.00143261	0.0426547	0.264832	0.809175	0.544343
cg24941342	NA	NA	0.00291403	0.0442236	0.240088	0.740114	0.500025
cg25133951	NA	NA	0.00143261	0.0426547	-0.214652	0.459866	0.674518
cg25198847	NA	NA	0.00182978	0.0426547	0.258581	0.802348	0.543767
cg25305879	NA	NA	0.00291403	0.0442236	0.261165	0.767277	0.506112
cg25430838	NA	NA	0.00451305	0.048697	0.252738	0.699003	0.446265
cg25757820	NA	NA	0.00291403	0.0442236	0.255999	0.825768	0.569769
cg25761791	NA	NA	0.00291403	0.0442236	0.240481	0.745239	0.504758
cg25790531	NA	NA	0.00231643	0.0430677	0.21761	0.842745	0.625134
cg25865108	NA	NA	0.00182978	0.0426547	0.237067	0.714104	0.477037
cg25968394	NA	NA	0.00231643	0.0430677	0.215176	0.833807	0.618631
cg26118358	NA	NA	0.00451305	0.048697	0.228812	0.687608	0.458796
cg26209169	NA	NA	0.00363662	0.045968	-0.200912	0.284775	0.485686
cg26314089	NA	NA	0.000857939	0.0426547	0.219473	0.832689	0.613217
cg26391219	NA	NA	0.00143261	0.0426547	0.205147	0.686831	0.481684
cg26514623	NA	NA	0.00291403	0.0442236	0.230887	0.817166	0.586279
cg26646867	NA	NA	0.00143261	0.0426547	0.226357	0.675108	0.448751
cg26688582	NA	NA	0.00182978	0.0426547	0.203434	0.793811	0.590377
cg26828017	NA	NA	0.00291403	0.0442236	0.24977	0.751025	0.501254
cg27027055	NA	NA	0.00182978	0.0426547	-0.220223	0.512762	0.732985
cg27044455	NA	NA	0.00182978	0.0426547	0.213254	0.717118	0.503864
cg27051231	NA	NA	0.00363662	0.045968	0.213718	0.71621	0.502492
cg27183818	NA	NA	0.00363662	0.045968	-0.28275	0.442353	0.725103
cg27377289	NA	NA	0.00291403	0.0442236	-0.259379	0.480376	0.739756
cg27430561	NA	NA	0.00182978	0.0426547	0.220385	0.806172	0.585787
cg27609217	NA	NA	0.00363662	0.045968	0.213737	0.671829	0.458092
rs2857639	NA	NA	0.00231643	0.0430677	-0.349165	0.323563	0.672728
cg19595244	AHCYL1	NM_006621	0.00231643	0.0430677	0.225078	0.733913	0.508835
cg24681307	AHCYL1	NM_006621	0.00291403	0.0442236	0.217068	0.656246	0.439178
cg01699630	ARG1	NM_000045	0.00182978	0.0426547	0.220321	0.842198	0.621877
cg22898924	ARRDC5	NM_001080523	0.00182978	0.0426547	0.208867	0.74108	0.532213
cg27485921	ATP6V1E2	NM_080653	0.00231643	0.0430677	0.215659	0.668551	0.452892
cg04046364	AVIL	NM_006576	0.00451305	0.048697	0.217839	0.704849	0.48701
cg06317209	AVIL	NM_006576	0.00231643	0.0430677	0.226583	0.713174	0.486591
cg14801864	BFSP1	NM_001161705	0.00231643	0.0430677	0.218125	0.738133	0.520007
cg04036920	C11orf41	NM_012194	0.00291403	0.0442236	0.221881	0.854126	0.632245
cg08939373	C11orf41	NM_012194	0.00231643	0.0430677	0.221434	0.726462	0.505028
cg10611016	C11orf42	NM_173525	0.00231643	0.0430677	0.265194	0.822407	0.557213
cg07409200	C13orf30	NM_182508	0.00363662	0.045968	0.201535	0.646262	0.444727
cg17344770	C19orf71	NM_001135580	0.00231643	0.0430677	0.290379	0.727229	0.43685
cg15644413	C1orf216	NM_152374	0.000857939	0.0426547	0.200776	0.833495	0.63272
cg23491841	C2orf85	NM_173821	0.00291403	0.0442236	-0.227486	0.342483	0.569969
cg01048372	C8orf73	NM_001100878	0.00182978	0.0426547	0.201345	0.747676	0.546331
cg10408731	CCT6P1	NR_003110	0.00231643	0.0430677	0.267744	0.820019	0.552275
cg21492378	CEP110	NM_007018	0.00363662	0.045968	0.258391	0.766394	0.508003
cg10752508	CPOX	NM_000097	0.00451305	0.048697	0.257733	0.73195	0.474217
cg07814567	DAPP1	NM_014395	0.000656027	0.0426547	0.208222	0.76243	0.554209
cg02787689	DEFA10P	NR_029386	0.00111458	0.0426547	0.200796	0.704095	0.503299
cg21587469	DGKA	NM_001345	0.00363662	0.045968	-0.219167	0.390676	0.609843
cg22381196	DHODH	NM_001361	0.00231643	0.0430677	0.295337	0.826745	0.531408
cg04118119	ESD	NM_001984	0.00182978	0.0426547	0.260289	0.739594	0.479305
cg16374656	EXT1	NM_000127	0.00291403	0.0442236	0.241633	0.802829	0.561196
cg12141056	FAM129A	NM_052966	0.00182978	0.0426547	-0.218982	0.543234	0.762216
cg00510689	FAM71B	NM_130899	0.00182978	0.0426547	-0.219925	0.533366	0.753291
cg05641903	FCER2	NM_002002	0.00291403	0.0442236	0.213206	0.67485	0.461644
cg04837616	FLJ45079	NR_028337	0.00231643	0.0430677	0.200385	0.76431	0.563925
cg00032884	FOXN2	NM_002158	0.00231643	0.0430677	-0.228971	0.499772	0.728743
cg09674502	GFI1	NM_005263	0.00182978	0.0426547	0.219248	0.752627	0.533379
cg12614630	GPR182	NM_007264	0.00182978	0.0426547	0.240952	0.73181	0.490858
cg01932823	GPR97	NM_170776	0.00111458	0.0426547	0.227379	0.74726	0.519881
cg25103337	H6PD	NM_004285	0.00182978	0.0426547	0.240186	0.706239	0.466053
cg08817540	HHLA2	NM_007072	0.000495534	0.0426547	-0.297836	0.283285	0.581122
cg19240569	HRASLS2	NM_017878	0.00143261	0.0426547	-0.209249	0.446077	0.655325
cg24414325	IKZF4	NM_022465	0.00182978	0.0426547	0.204264	0.678302	0.474038
cg12380764	IL19	NM_153758	0.00291403	0.0442236	0.20081	0.649593	0.448783
cg11916609	IL1RL1	NM_016232	0.00291403	0.0442236	0.215861	0.768329	0.552468
cg06468347	ITGAE	NM_002208	0.00363662	0.045968	0.21422	0.637034	0.422813
cg10958452	KDM4A	NM_014663	0.00363662	0.045968	0.228625	0.749118	0.520493
cg07880109	KIAA0748	NM_001136030	0.00363662	0.045968	-0.200249	0.355004	0.555253
cg20008101	LGALS3	NM_002306	0.00231643	0.0430677	0.247847	0.765753	0.517906
cg22613968	MDS2	NR_027042	0.000857939	0.0426547	-0.214149	0.475071	0.68922
cg01261013	MORC3	NM_015358	0.00143261	0.0426547	0.232374	0.780163	0.547789
cg15474337	NAPSB	NR_002798	0.00182978	0.0426547	-0.250066	0.312845	0.56291
cg14022913	NEIL3	NM_018248	0.00291403	0.0442236	0.222657	0.736792	0.514135
cg08730245	NPFF	NM_003717	0.00231643	0.0430677	0.244985	0.828359	0.583374
cg00112952	OR2B11	NM_001004492	0.00451305	0.048697	0.249005	0.795693	0.546688
cg03889044	PDCD1	NM_005018	0.00182978	0.0426547	-0.200742	0.375659	0.576401
cg19931348	PI3	NM_002638	0.00182978	0.0426547	0.21434	0.791324	0.576984
cg18715793	PLIN4	NM_001080400	0.000656027	0.0426547	0.203789	0.829319	0.62553
cg02319986	PRAM1	NM_032152	0.00231643	0.0430677	0.22975	0.780751	0.551001
cg15971518	PRG2	NM_002728	0.00143261	0.0426547	0.322173	0.654804	0.332631
cg04407248	PRSS8	NM_002773	0.00111458	0.0426547	0.241162	0.791186	0.550024
cg17833106	PVRL4	NM_030916	0.00182978	0.0426547	0.239695	0.751095	0.5114
cg21923525	RALBP1	NM_006788	0.00291403	0.0442236	0.22819	0.645418	0.417228
cg14272075	RNF126P1	NR_002818	0.00231643	0.0430677	0.260516	0.759618	0.499102
cg06110802	RPS3A	NM_001006	0.000274392	0.0426547	-0.202379	0.536689	0.739068
cg09993145	RUNX3	NM_001031680	0.00143261	0.0426547	-0.311317	0.214883	0.526199
cg16493584	SAMD3	NM_001017373	0.00231643	0.0430677	-0.241347	0.545233	0.78658
cg25913761	SEMA4B	NM_020210	0.00451305	0.048697	-0.212193	0.424066	0.636258
cg26955540	SEMA4B	NM_020210	0.00363662	0.045968	-0.211713	0.485404	0.697117
cg21088438	SLC10A1	NM_003049	0.00182978	0.0426547	0.235294	0.680956	0.445662
cg15033269	SS18L2	NM_016305	0.00231643	0.0430677	0.260339	0.741337	0.480998
cg03766264	STK38L	NM_015000	0.000857939	0.0426547	0.24892	0.72308	0.47416
cg05171937	STK38L	NM_015000	0.00363662	0.045968	0.275942	0.809023	0.533082
cg24746726	SULT1E1	NM_005420	0.00363662	0.045968	0.225374	0.724012	0.498638
cg22241838	TMEM109	NM_024092	0.00363662	0.045968	-0.220816	0.28592	0.506737
cg09470754	TMEM150B	NM_001085488	0.00291403	0.0442236	0.200959	0.611878	0.410918
cg02131853	TMEM156	NM_024943	0.00291403	0.0442236	-0.201306	0.506652	0.707958
cg07291836	TP53RK	NM_033550	0.00231643	0.0430677	0.217352	0.769395	0.552043
cg00686823	TPRA1	NM_001142646	0.00363662	0.045968	0.247106	0.665257	0.418151
cg00009088	VPS37C	NM_017966	0.00111458	0.0426547	0.227965	0.792947	0.564982
cg08338281	WIBG	NM_032345	0.00143261	0.0426547	-0.239321	0.44692	0.686242
cg08859278	ZAP70	NM_001079	0.00182978	0.0426547	-0.207225	0.474554	0.681779
cg03068068	ZBTB32	NM_014383	0.00231643	0.0430677	-0.201627	0.436095	0.637722
cg11316887	SVIL;SVIL	NM_021738;NM_003174	0.00451305	0.048697	-0.264397	0.429808	0.694206
cg26861460	PARVG;PARVG;PARVG;PARVG	NM_022141;NM_001137605;NR_024427;NR_024426	0.00451305	0.048697	0.259041	0.724347	0.465306
cg00842918	GAS7;GAS7	NM_201432;NM_201433	0.00182978	0.0426547	0.201115	0.775626	0.574511
cg01323964	SNORA22;CCT6P1	NR_002961;NR_003110	0.00363662	0.045968	0.248972	0.782048	0.533076
cg00084577	SNORA30;SRCAP	NR_002966;NM_006662	0.000857939	0.0426547	0.226941	0.834243	0.607303
cg13059136	SNORA54;NAP1L4	NR_002982;NM_005969	0.00111458	0.0426547	0.238575	0.828938	0.590363
cg14480116	SPRED2;SPRED2	NM_001128210;NM_181784	0.00363662	0.045968	0.234225	0.728052	0.493827
cg16449084	SSH3;ANKRD13D;ANKRD13D	NM_017857;NR_030767;NM_207354	0.00231643	0.0430677	0.207368	0.670625	0.463256
cg21471199	ALDH4A1;ALDH4A1;ALDH4A1	NM_001161504;NM_170726;NM_003748	0.00143261	0.0426547	0.215662	0.763676	0.548014
cg19620994	AADACL3;AADACL3	NM_001103170;NM_001103169	0.00363662	0.045968	0.225101	0.738215	0.513114
cg10710218	ACOT11;ACOT11	NM_147161;NM_015547	0.00363662	0.045968	0.207194	0.629159	0.421966
cg00225858	ADAD2;ADAD2	NM_139174;NM_001145400	0.00231643	0.0430677	0.232575	0.80618	0.573604
cg16422316	AP1G1;AP1G1	NM_001128;NM_001030007	0.00451305	0.048697	0.200794	0.768467	0.567674
cg07377519	AP2A1;AP2A1	NM_130787;NM_014203	0.00182978	0.0426547	0.213527	0.588081	0.374555
cg01632240	AP3M2;AP3M2	NM_001134296;NM_006803	0.00182978	0.0426547	0.255078	0.755611	0.500532
cg20078972	BRD4;BRD4	NM_058243;NM_014299	0.00451305	0.048697	0.224014	0.718349	0.494335
cg11905488	CLEC12A;CLEC12A	NM_201623;NM_138337	0.00111458	0.0426547	0.202721	0.821103	0.618381
cg17889831	DSTYK;DSTYK	NM_199462;NM_015375	0.00363662	0.045968	0.20614	0.642952	0.436812
cg04225088	HIPK3;HIPK3	NM_005734;NM_001048200	0.00291403	0.0442236	0.220718	0.740047	0.519329
cg10596483	JRK;JRK	NM_003724;NM_001077527	0.00363662	0.045968	-0.327195	0.330884	0.65808
cg24634471	JRK;JRK	NM_003724;NM_001077527	0.00291403	0.0442236	-0.362929	0.361988	0.724917
cg21892720	LAIR1;LAIR1	NM_021706;NM_002287	0.00182978	0.0426547	0.214561	0.748495	0.533934
cg12488187	MSRB3;MSRB3	NM_198080;NM_001031679	0.00363662	0.045968	0.207357	0.778451	0.571094
cg13692972	OTUB1;OTUB1	NR_003089;NM_017670	0.00231643	0.0430677	0.221106	0.774233	0.553127
cg03340036	PIGY;PIGY	NM_001042616;NM_032906	0.00231643	0.0430677	0.243428	0.821667	0.578239
cg20613972	PLAC8;PLAC8	NM_016619;NM_001130715	0.00143261	0.0426547	0.201997	0.821957	0.61996
cg10557578	RAB11FIP1;RAB11FIP1	NM_025151;NM_001002814	0.00231643	0.0430677	0.201697	0.745535	0.543838
cg13047308	RAPSN;RAPSN	NM_005055;NM_032645	0.00182978	0.0426547	0.215559	0.826423	0.610864
cg02769705	TMEM183B;TMEM183A	NM_001079809;NM_138391	0.00291403	0.0442236	0.259031	0.719143	0.460112
cg09646392	TNFSF13B;TNFSF13B	NM_006573;NM_001145645	0.00291403	0.0442236	0.227337	0.708211	0.480874
cg27280688	UBASH3A;UBASH3A	NM_001001895;NM_018961	0.00291403	0.0442236	-0.228708	0.484779	0.713486
cg05422796	ZFP161;ZFP161	NM_001143823;NM_003409	0.00182978	0.0426547	0.202169	0.653576	0.451407
cg01796438	ATG7;ATG7;ATG7	NM_001144912;NM_006395;NM_001136031	0.00231643	0.0430677	0.229192	0.726174	0.496983
cg05160234	CD3G;CD3D;CD3D	NM_000073;NM_000732;NM_001040651	0.00291403	0.0442236	-0.209171	0.495127	0.704298
cg13750061	CD3G;CD3D;CD3D	NM_000073;NM_000732;NM_001040651	0.00182978	0.0426547	-0.213368	0.578744	0.792112
cg18463607	EXOC1;EXOC1;EXOC1	NM_018261;NM_178237;NM_001024924	0.00363662	0.045968	-0.226922	0.519007	0.745928
cg07283015	HRH4;HRH4;HRH4	NM_021624;NM_001160166;NM_001143828	0.00451305	0.048697	0.227966	0.776821	0.548855
cg09416908	ME3;ME3;ME3	NM_001014811;NM_006680;NM_001161586	0.00291403	0.0442236	0.250845	0.729181	0.478336
cg07043361	RBM19;RBM19;RBM19	NM_001146699;NM_016196;NM_001146698	0.00231643	0.0430677	0.219021	0.646226	0.427205
cg12929983	BMF;BMF;BMF;BMF	NM_033503;NM_001003943;NM_001003942;NM_001003940	0.00182978	0.0426547	0.214099	0.650054	0.435955
cg24519108	ANGPT2;ANGPT2;ANGPT2;MCPH1	NM_001118888;NM_001118887;NM_001147;NM_024596	0.00111458	0.0426547	0.208761	0.70127	0.492509
cg24743156	CTAGE5;CTAGE5;CTAGE5;CTAGE5	NM_005930;NM_203356;NM_203355;NM_203354	0.00451305	0.048697	0.240011	0.738372	0.498361
cg03048029	SYNJ1;SYNJ1;SYNJ1;SYNJ1	NM_001160306;NM_203446;NM_001160302;NM_003895	0.00182978	0.0426547	0.227897	0.716758	0.488861
cg08425760	AGTRAP;AGTRAP;AGTRAP;AGTRAP;AGTRAP	NM_001040194;NM_001040197;NM_001040195;NM_001040196;NM_020350	0.00291403	0.0442236	0.212366	0.700398	0.488032
cg22742001	GIT2;GIT2;GIT2;GIT2;GIT2;GIT2	NM_139201;NM_001135214;NM_057170;NM_057169;NM_001135213;NM_014776	0.000656027	0.0426547	0.232525	0.659178	0.426653
cg13015616	HFE;HFE;HFE;HFE;HFE;HFE;HFE;HFE;HFE	NM_139006;NM_139011;NM_000410;NM_139004;NM_139007;NM_139010;NM_139009;NM_139003;NM_139008	0.00291403	0.0442236	-0.204223	0.52444	0.728663
cg13441156	GHRL;GHRL;GHRL;GHRL;GHRL;GHRL;GHRL;GHRL;GHRL;GHRL	NM_001134946;NR_024137;NM_001134944;NR_024135;NR_024133;NR_024136;NR_024138;NR_024132;NM_001134945;NR_024134	0.000857939	0.0426547	0.270134	0.811209	0.541074
cg21815704	GLRX2;GLRX2	NM_197962;NM_016066	0.00111458	0.0426547	0.264114	0.738292	0.474178
cg13999433	AKNA	NM_030767	0.00291403	0.0442236	0.21908	0.724324	0.505245
cg22534097	ANKRD1	NM_014391	0.00451305	0.048697	0.242918	0.742231	0.499313
cg04946561	ARRDC5	NM_001080523	0.00363662	0.045968	0.228975	0.725911	0.496936
cg14018648	ASGR1	NM_001671	0.00363662	0.045968	0.203688	0.664749	0.461061
cg17322118	BCL10	NM_003921	0.000495534	0.0426547	0.227727	0.874203	0.646476
cg12991306	C8orf80	NM_001010906	0.00182978	0.0426547	-0.237102	0.480742	0.717844
cg01135648	DCAF4L1	NM_001029955	0.00231643	0.0430677	0.238709	0.785119	0.54641
cg06270401	DYRK4	NM_003845	0.00231643	0.0430677	0.230588	0.821309	0.59072
cg06625767	F12	NM_000505	0.00231643	0.0430677	0.234252	0.755798	0.521546
cg10161121	FASLG	NM_000639	0.00182978	0.0426547	-0.250662	0.482603	0.733265
cg11809958	FGD4	NM_139241	0.00182978	0.0426547	0.218122	0.811593	0.593471
cg22431093	FGD4	NM_139241	0.00182978	0.0426547	0.205925	0.795698	0.589773
cg02584498	GREB1	NM_014668	0.00182978	0.0426547	0.224731	0.781976	0.557244
cg00113675	HLA-H	NR_001434	0.00182978	0.0426547	0.220517	0.631302	0.410785
cg26329274	ITK	NM_005546	0.00451305	0.048697	-0.237122	0.340946	0.578068
cg14615559	LCN2	NM_005564	0.00111458	0.0426547	0.257776	0.792611	0.534835
cg00446123	LIME1	NM_017806	0.00363662	0.045968	-0.284128	0.277397	0.561525
cg21201401	LIME1	NM_017806	0.00451305	0.048697	-0.237263	0.239671	0.476934
cg00444740	MIR1208	NR_031613	0.00291403	0.0442236	0.226264	0.672754	0.44649
cg14522803	PNPLA2	NM_020376	0.000656027	0.0426547	0.215088	0.661282	0.446193
cg24427660	PNPLA2	NM_020376	0.00363662	0.045968	0.240148	0.679422	0.439273
cg27058497	RUNX3	NM_001031680	0.00182978	0.0426547	-0.27313	0.228647	0.501777
cg22660207	SCRG1	NM_007281	0.00111458	0.0426547	0.20767	0.754048	0.546378
cg01448863	SLC10A1	NM_003049	0.00231643	0.0430677	0.23932	0.699779	0.460459
cg01081737	SLC45A4	NM_001080431	0.00291403	0.0442236	0.222887	0.783663	0.560776
cg07769015	SLC45A4	NM_001080431	0.00363662	0.045968	0.220057	0.788631	0.568574
cg15586392	SLC45A4	NM_001080431	0.00143261	0.0426547	0.241602	0.771699	0.530097
cg25930786	TARM1	NM_001135686	0.00231643	0.0430677	0.212068	0.705608	0.49354
cg08796342	TC2N	NM_001128596	0.00291403	0.0442236	-0.240105	0.401888	0.641993
cg10725937	TREM2	NM_018965	0.00451305	0.048697	0.219141	0.713231	0.49409
cg17984638	TXK	NM_003328	0.00231643	0.0430677	-0.235451	0.50552	0.740971
cg03126694	LPAR6;LPAR6;RB1	NM_001162497;NM_005767;NM_000321	0.00182978	0.0426547	0.202709	0.596319	0.39361
cg19429405	C10orf105;CDH23	NM_001168390;NM_022124	0.00231643	0.0430677	0.200455	0.711394	0.510939
cg08450017	CXCR6;FYCO1	NM_006564;NM_024513	0.00363662	0.045968	-0.221817	0.319384	0.541201
cg13584531	MGAT4A;MGAT4A	NM_001160154;NM_012214	0.00363662	0.045968	-0.225037	0.488821	0.713858
cg11671363	MIR145;LOC728264	NR_029686;NR_027180	0.00363662	0.045968	0.219416	0.76794	0.548524
cg22941668	MIR145;LOC728264	NR_029686;NR_027180	0.00363662	0.045968	0.207699	0.765582	0.557883
cg11377047	MIR1976;RPS6KA1;RPS6KA1	NR_031740;NM_001006665;NM_002953	0.00291403	0.0442236	0.242966	0.65351	0.410544
cg00324097	SEPT9;SEPT9;SEPT9;SEPT9;SEPT9;SEPT9	NM_001113496;NM_001113492;NM_001113493;NM_001113491;NM_006640;NM_001113494	0.00182978	0.0426547	-0.221012	0.285491	0.506502
cg21204860	SEPT9;SEPT9;SEPT9;SEPT9;SEPT9;SEPT9	NM_001113496;NM_001113492;NM_001113493;NM_001113491;NM_006640;NM_001113494	0.00291403	0.0442236	-0.209596	0.367888	0.577484
cg05382012	AGRP;AGRP	NM_001138;NM_007316	0.00363662	0.045968	0.237191	0.709959	0.472768
cg07545925	CD3G;CD3D;CD3D	NM_000073;NM_000732;NM_001040651	0.00231643	0.0430677	-0.211506	0.565855	0.777361
cg01580228	MIR1304;SNORA8;SNORD5;SNORA18	NR_031639;NR_002920;NR_003033;NR_002959	0.00182978	0.0426547	0.250537	0.709175	0.458638
cg08783253	AOC2;AOC2	NM_001158;NM_009590	0.00182978	0.0426547	0.214039	0.72811	0.514071
cg05655806	CD96;CD96	NM_198196;NM_005816	0.00291403	0.0442236	-0.218359	0.353021	0.571381
cg12810837	CLEC2D;CLEC2D	NM_013269;NM_001004419	0.00182978	0.0426547	-0.29562	0.336218	0.631838
cg08905487	LAIR2;LAIR2	NM_002288;NM_021270	0.00451305	0.048697	0.206824	0.705456	0.498632
cg18920397	LY9;LY9	NM_001033667;NM_002348	0.00231643	0.0430677	-0.257197	0.3293	0.586497
cg02863947	NR1I2;NR1I2	NM_003889;NM_033013	0.00291403	0.0442236	0.217241	0.711892	0.494651
cg21805118	DIABLO;DIABLO;DIABLO;DIABLO	NM_138929;NM_019887;NR_024601;NR_024600	0.00182978	0.0426547	-0.20025	0.489327	0.689577
